# Supplementary material for: Design, Synthesis, Molecular Docking, and Evaluation Antioxidant and Antimicrobial Activities for Novel 3-phenylimidazolidin-4-one and 2-aminothiazol-4-one Derivatives
Source: Molecules. 2022 Jan 24;27(3):767. doi: 10.3390/molecules27030767 (PMC8840376; doi:10.3390/molecules27030767)
Supplement: Supplementary file 1 [file molecules-27-00767-s001.zip › molecules-1541471-supplementary.pdf]

# Design, Synthesis, Molecular Docking, and Evaluation Antioxidant and Antimicrobial Activities for Novel 3-Phenylimidazolidin-4-One and 2-Aminothiazol-4-One Derivatives

Wesam S. Shehab <sup>1\*,†</sup>, Maged A. Aziz <sup>1,†</sup>, Nourhan Kh. R. Elhoseni <sup>1</sup>, Mohamed G. Assy <sup>1</sup>, Magda H. Abdellattif <sup>2</sup>, and Eman O. Hamed <sup>1</sup>

## Docking study

A molecular docking study of the sixteen newly designed and synthesized 3-phenylimidazolidin-4-one and 2-aminothiazol-4-one compounds was performed using MOE 2019.0102 program. The newly synthesized compounds were drawn using ChemDraw, imported into the MOE program window, converted for their 3D forms, adjusted for the partial charges, and energy minimized as described earlier. The database was built containing the newly synthesized candidates (1–11) together with the co-crystallized ascorbic acid as a reference standard. A general docking process was performed using the site of the co-crystallized ascorbic acid inside cytochrome *c* peroxidase and streptococcus pneumoniae hyaluronate lyase enzyme as the docking site. Also, all the other docking parameters were adjusted as previously discussed in detail. Moreover, it is worth mentioning that a program validation process was performed at first before applying the docking process by redocking the co-crystallized ascorbic acid at its binding pocket of the cytochrome *c* peroxidase enzyme and streptococcus pneumoniae hyaluronate lyase enzyme. A valid performance was confirmed by obtaining a low RMSD value (<1).

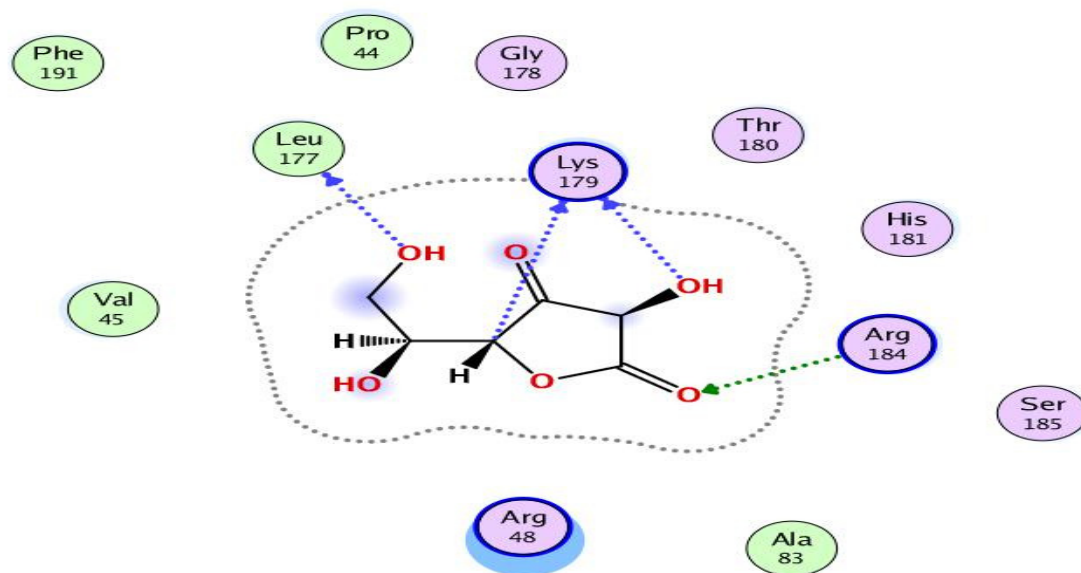

Figure S1. 2D interaction images of ascorbic acid with the active sites of 2X08.

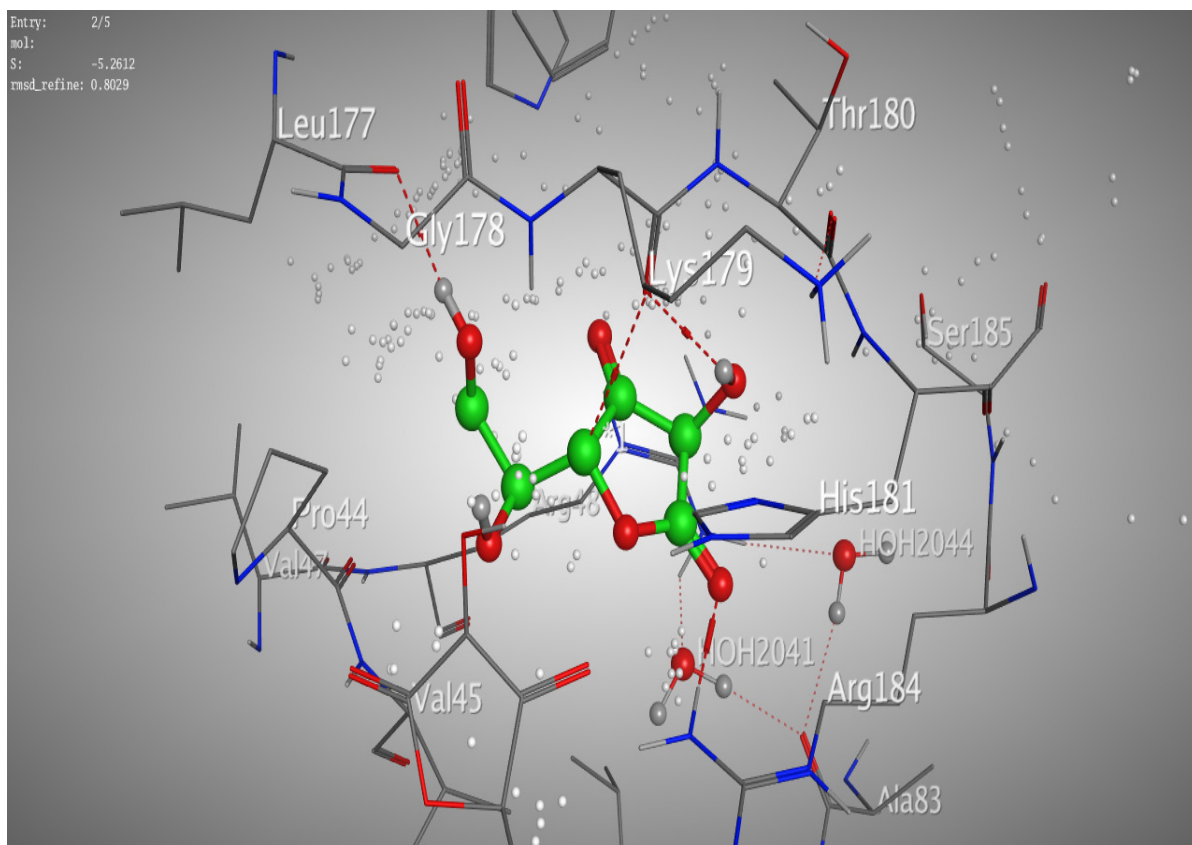

**Figure S2.** 3D interaction images of ascorbic acid with the active sites of 2X08.

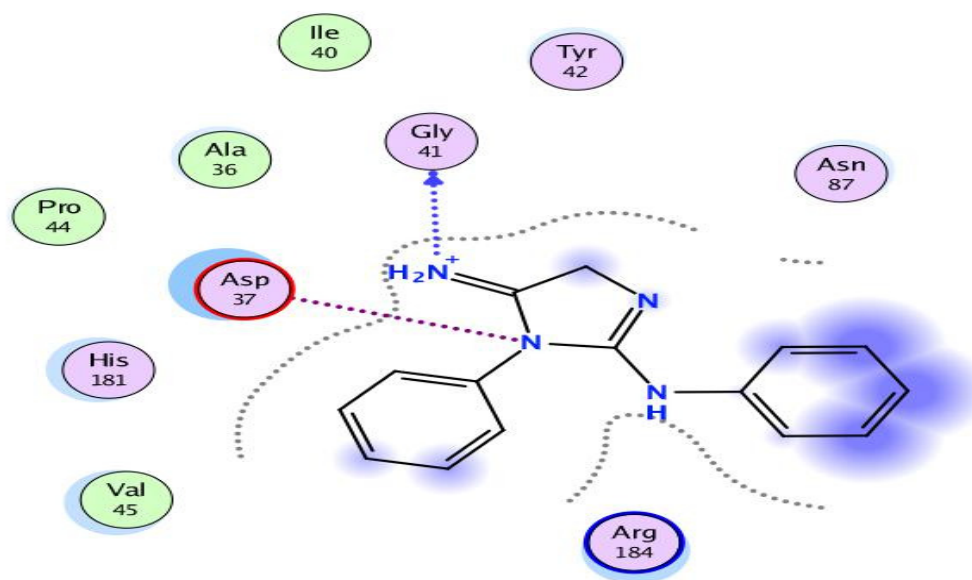

**Figure S3.** 2D interaction images of compound 2 with the active sites of 2X08.

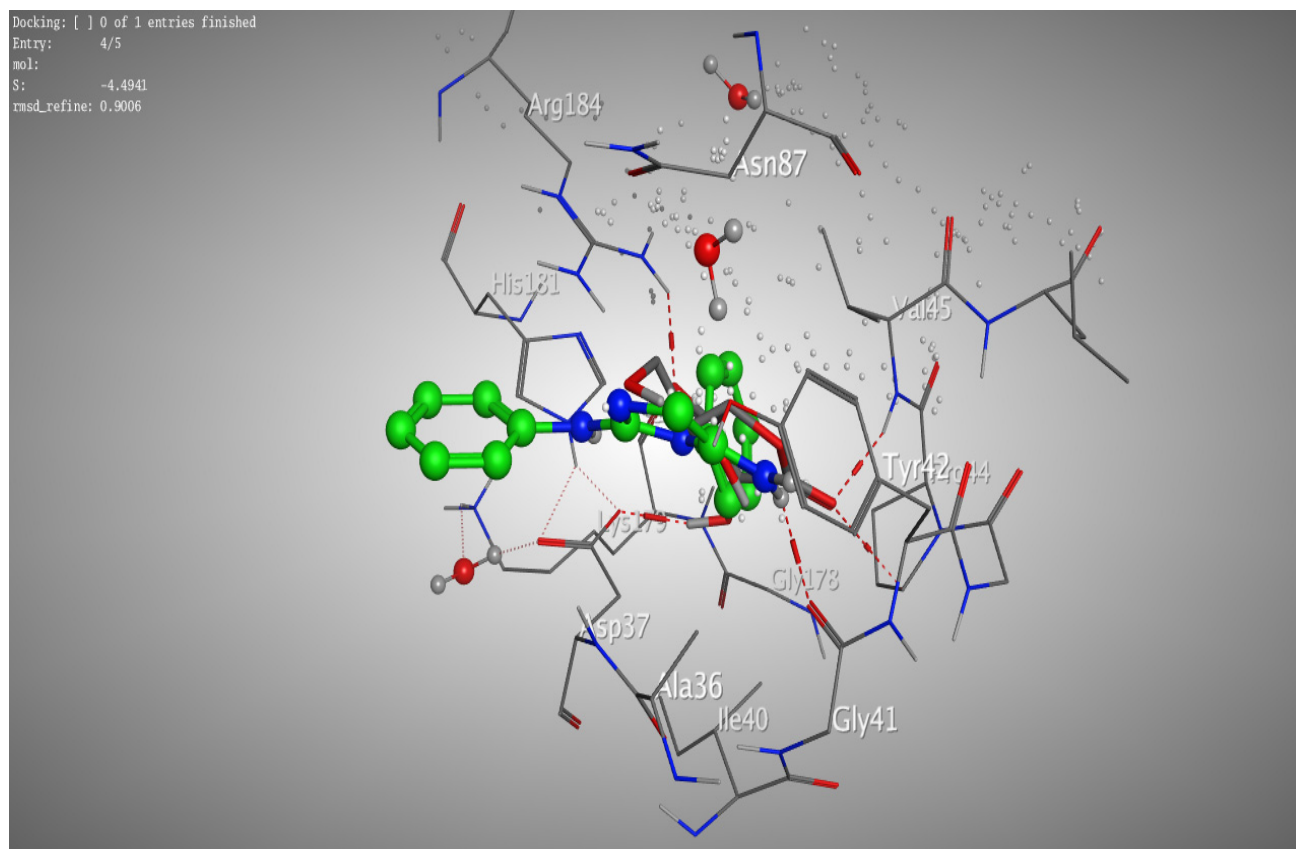

**Figure S4.** 3D interaction images of compound 2 with the active sites of 2X08.

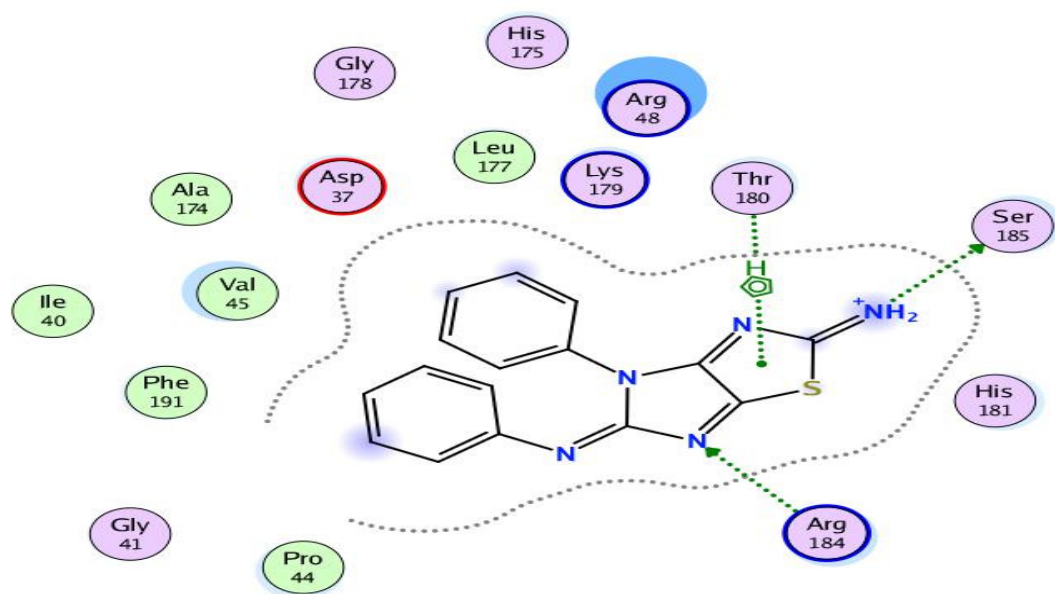

**Figure S5.** 2D interaction images of compound 3 with the active sites of 2X08.

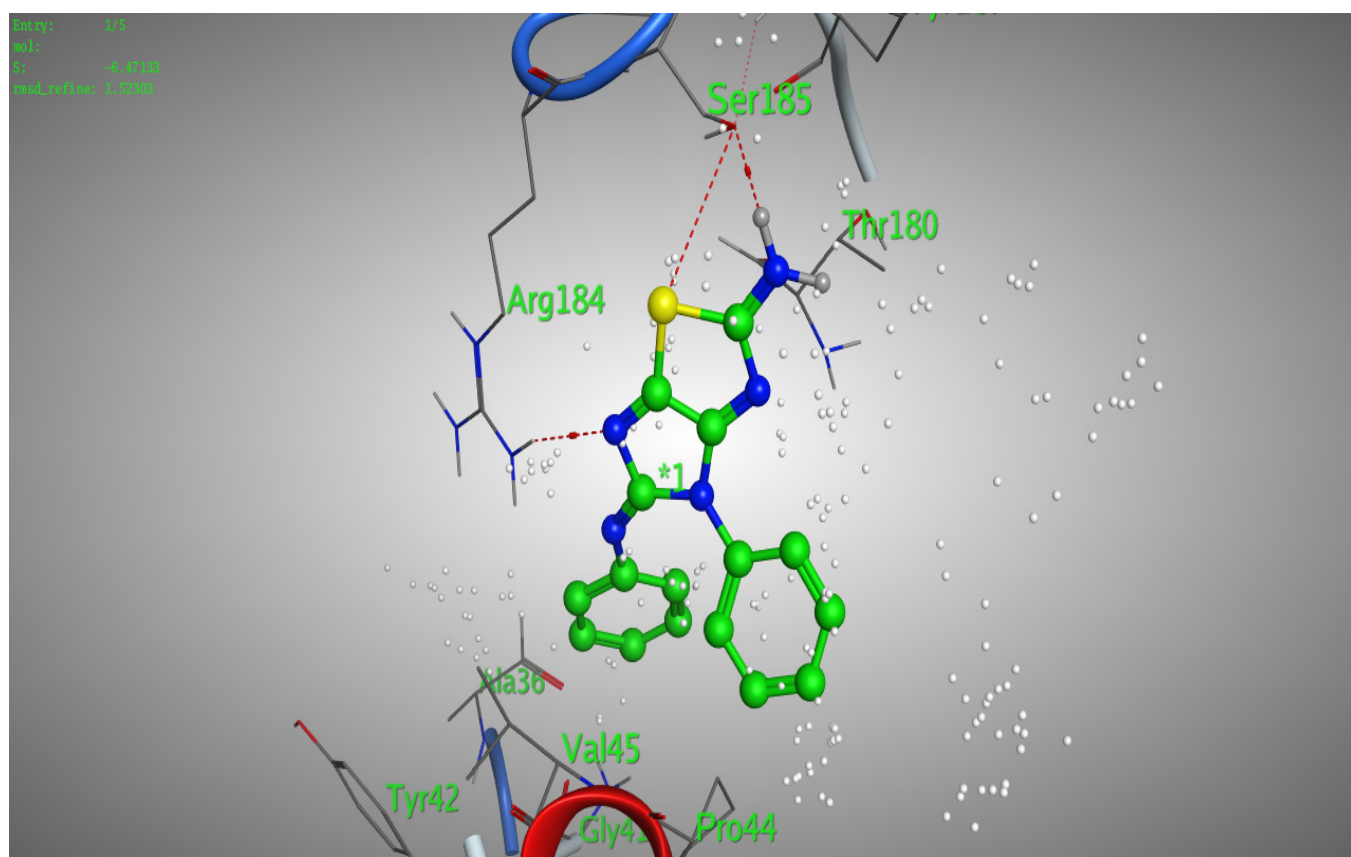

**Figure S6.** 3D interaction images of compound 3 with the active sites of 2X08.

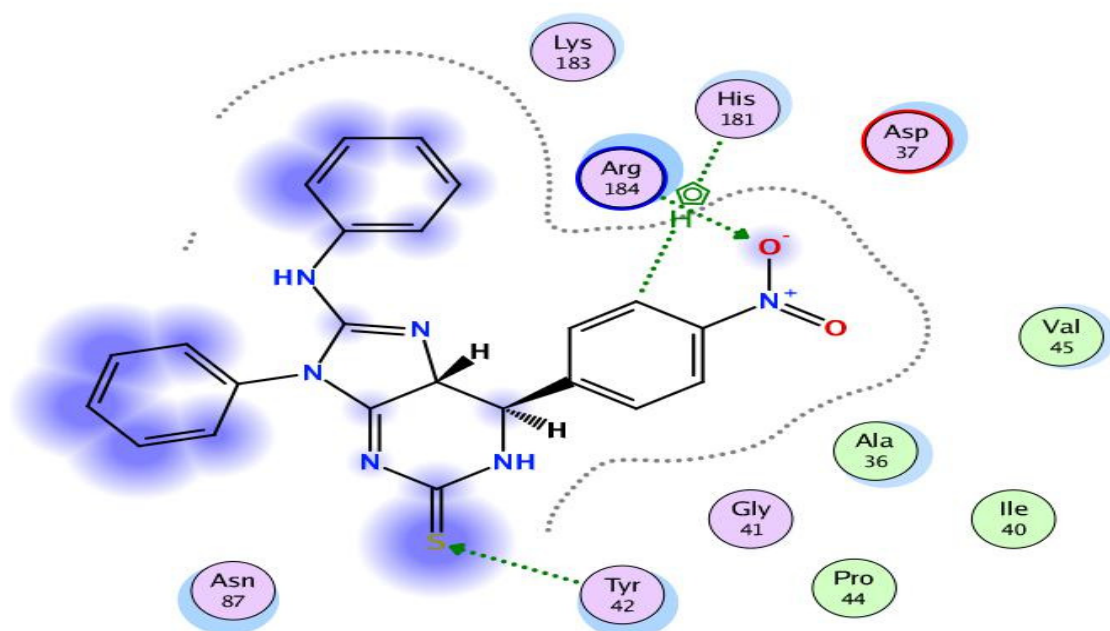

**Figure S7.** 2D interaction images of compound 5 with the active sites of 2X08.

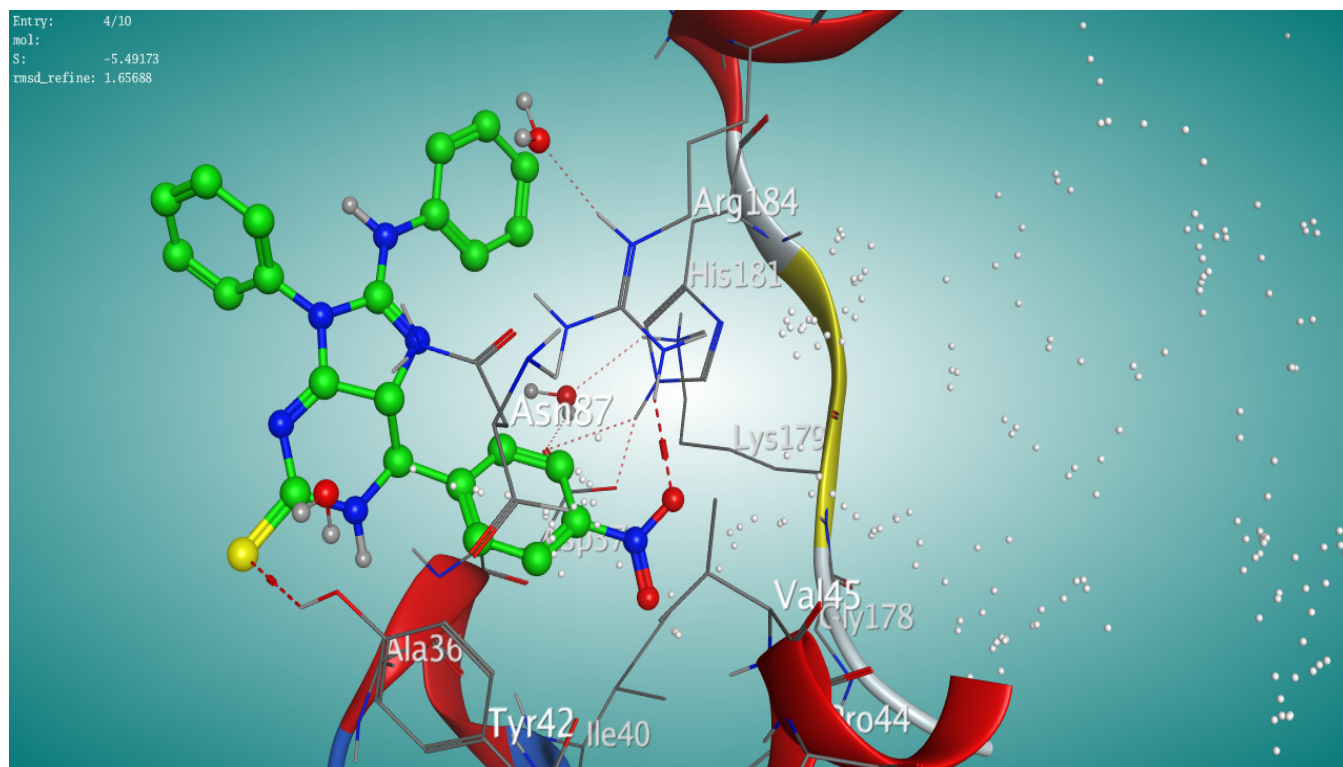

**Figure S8.** 3D interaction images of compound 5 with the active sites of 2X08.

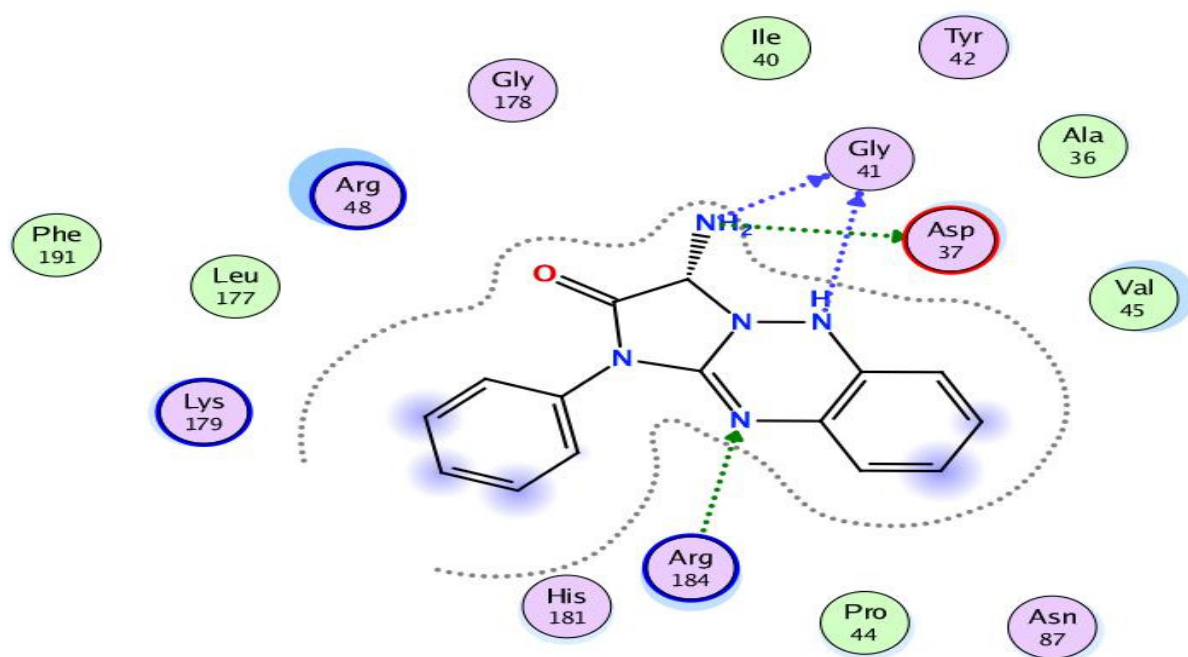

**Figure S9.** 2D interaction images of compound 6 with the active sites of 2X08.

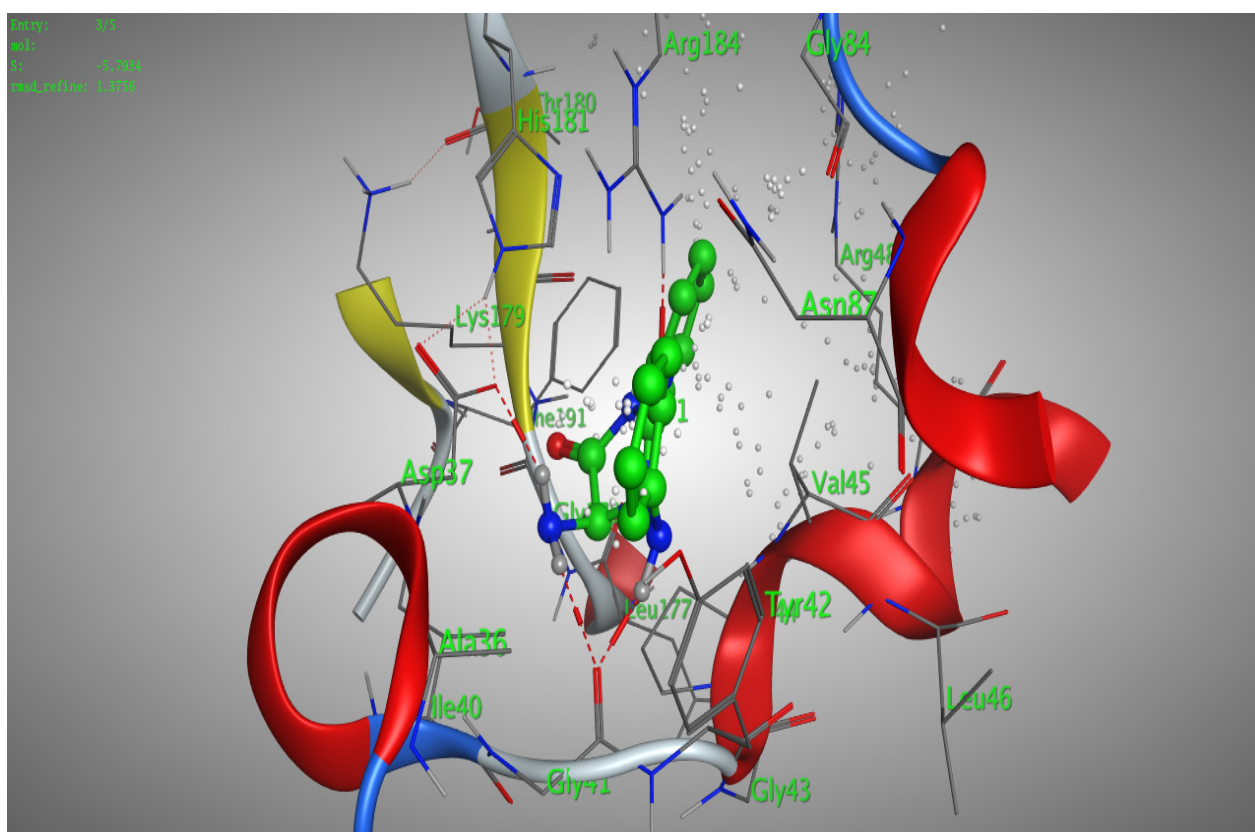

Figure S10. 3D interaction images of compound **6** with the active sites of 2X08.

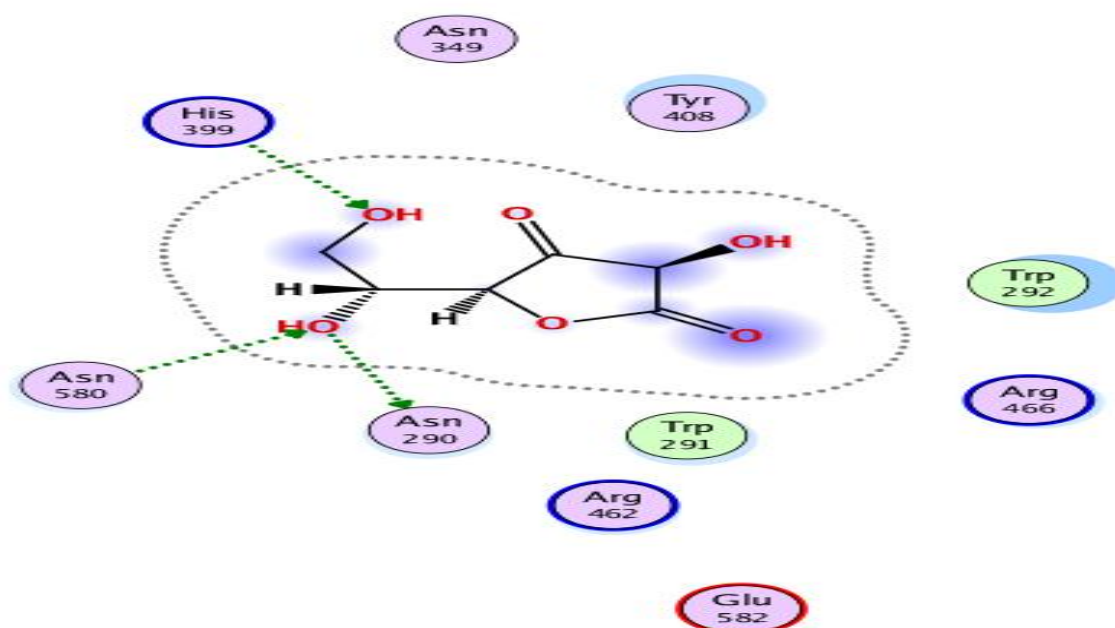

Figure S11. 2D interaction images of ascorbic acid with the active sites of 1F9G.

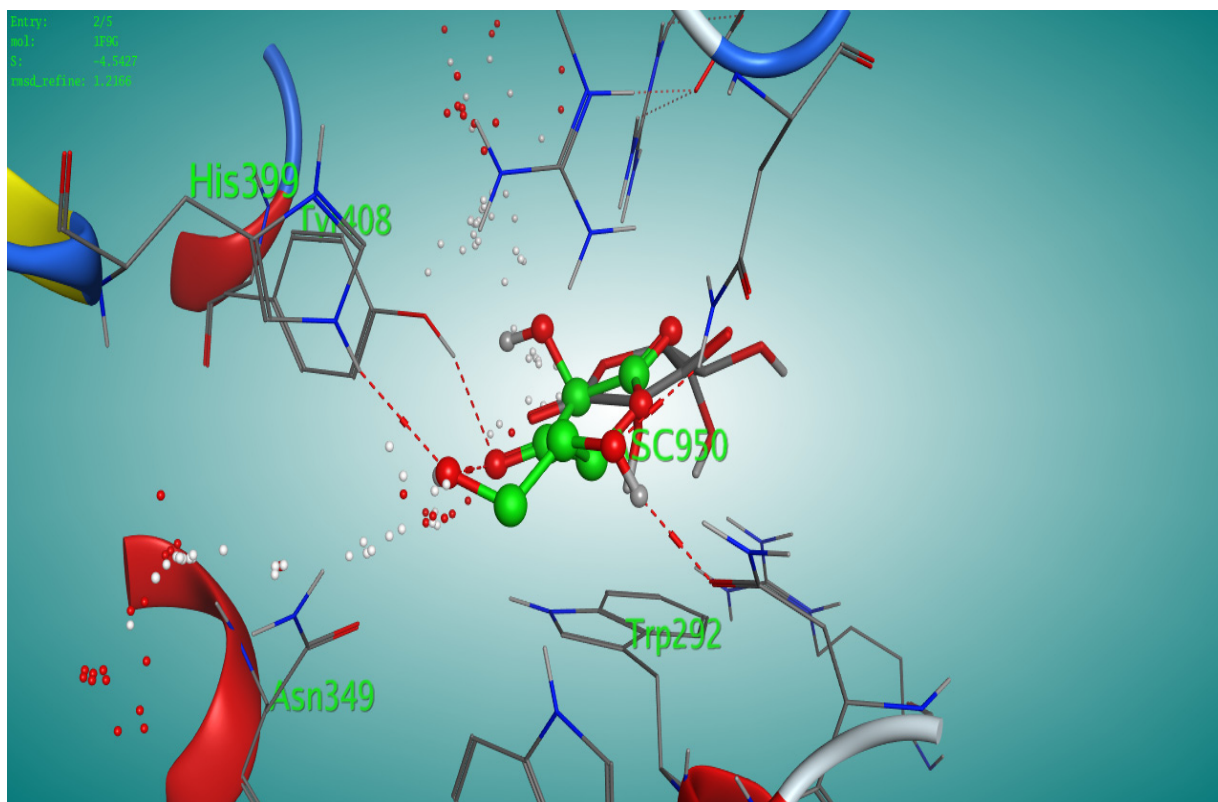

**Figure S12.** 3D interaction images of ascorbic acid with the active sites of 1F9G.

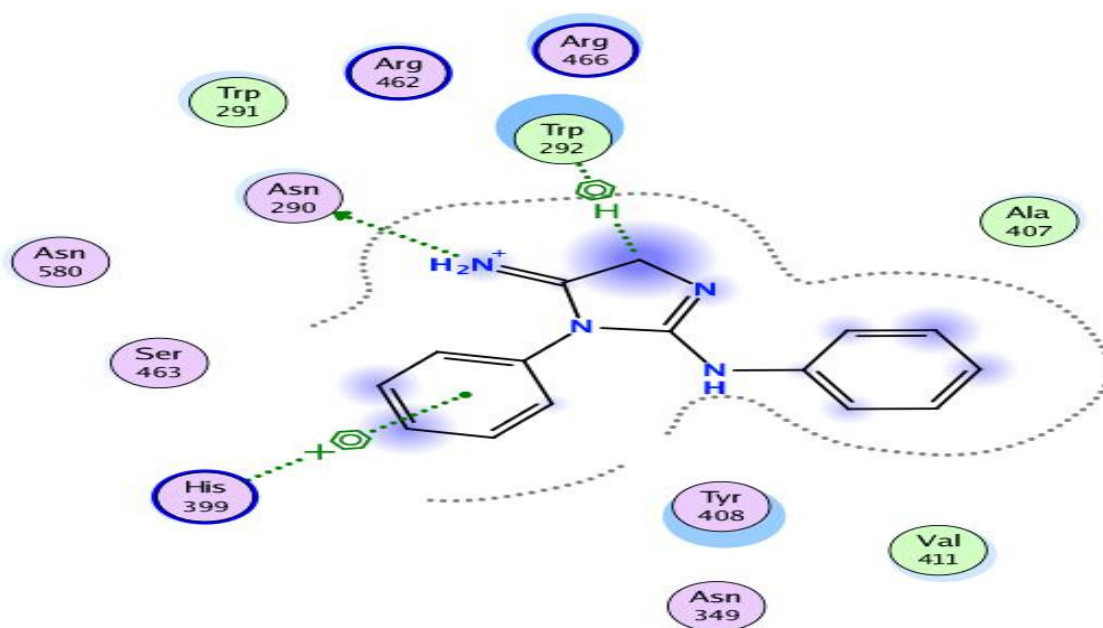

**Figure S13.** 2D interaction images of compound **2** with the active sites of 1F9G.

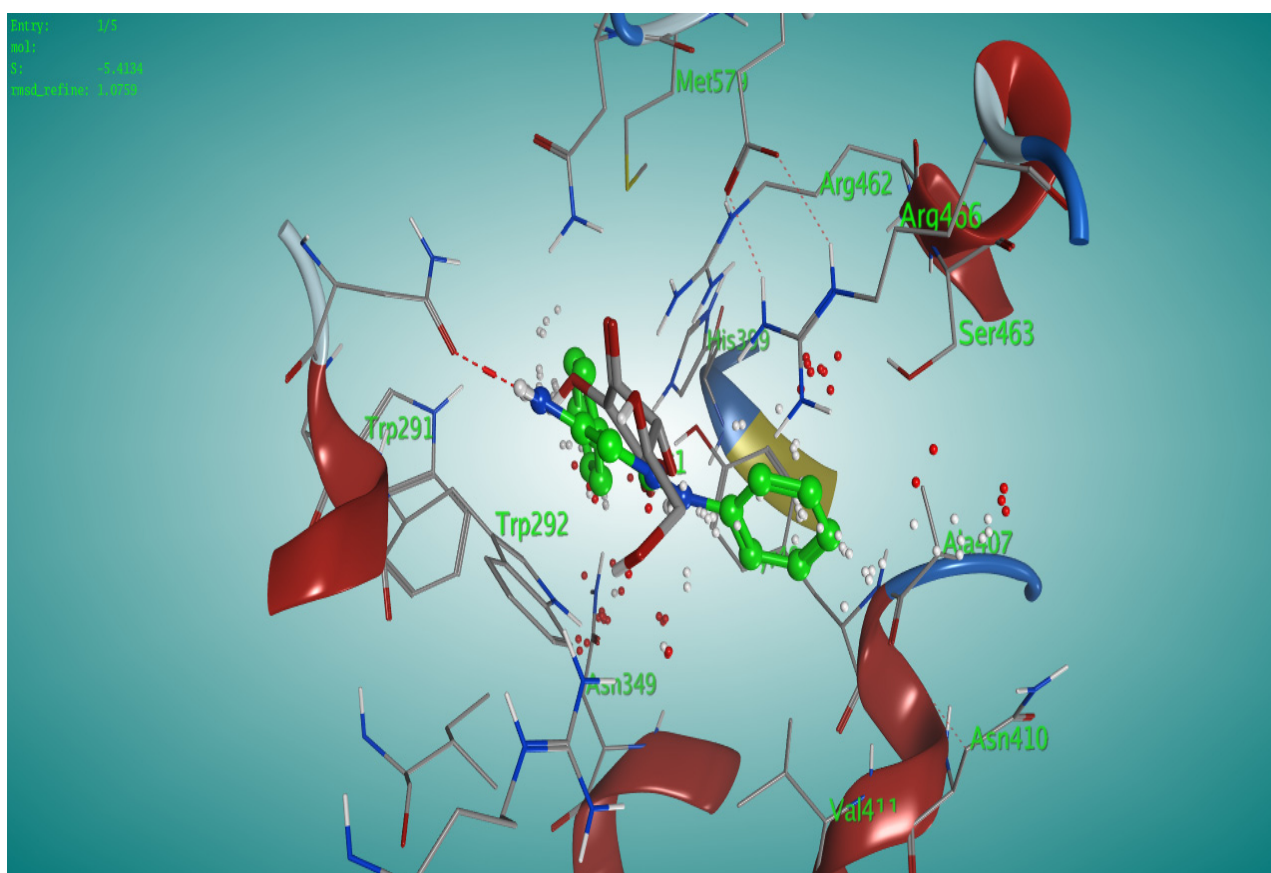

**Figure S14.** 3D interaction images of compound **2** with the active sites of 1F9G.

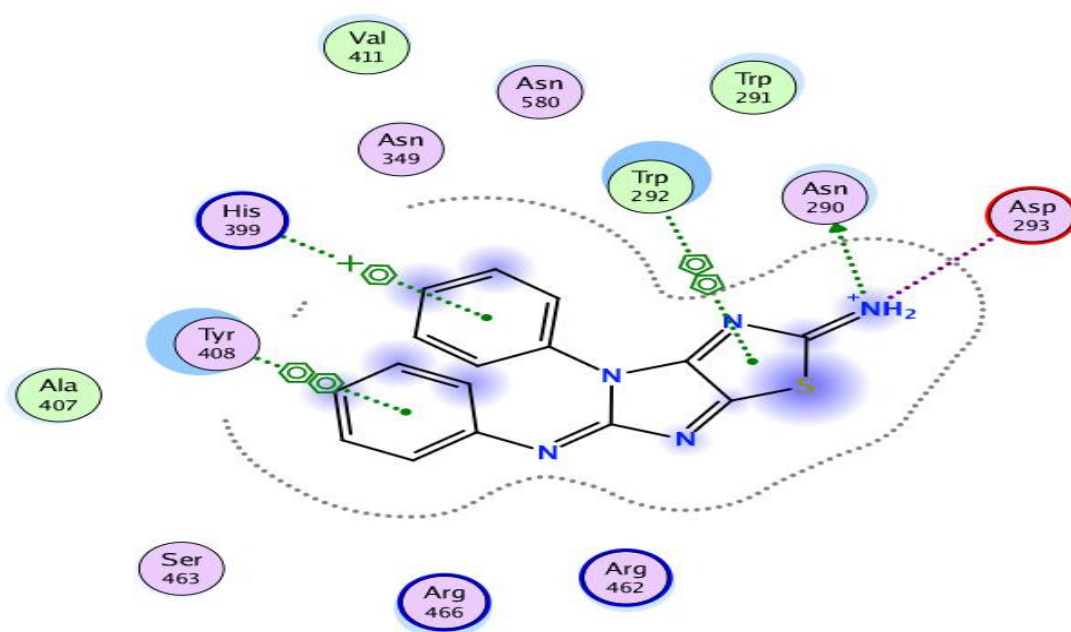

**Figure S15.** 2D interaction images of compound **3** with the active sites of 1F9G.

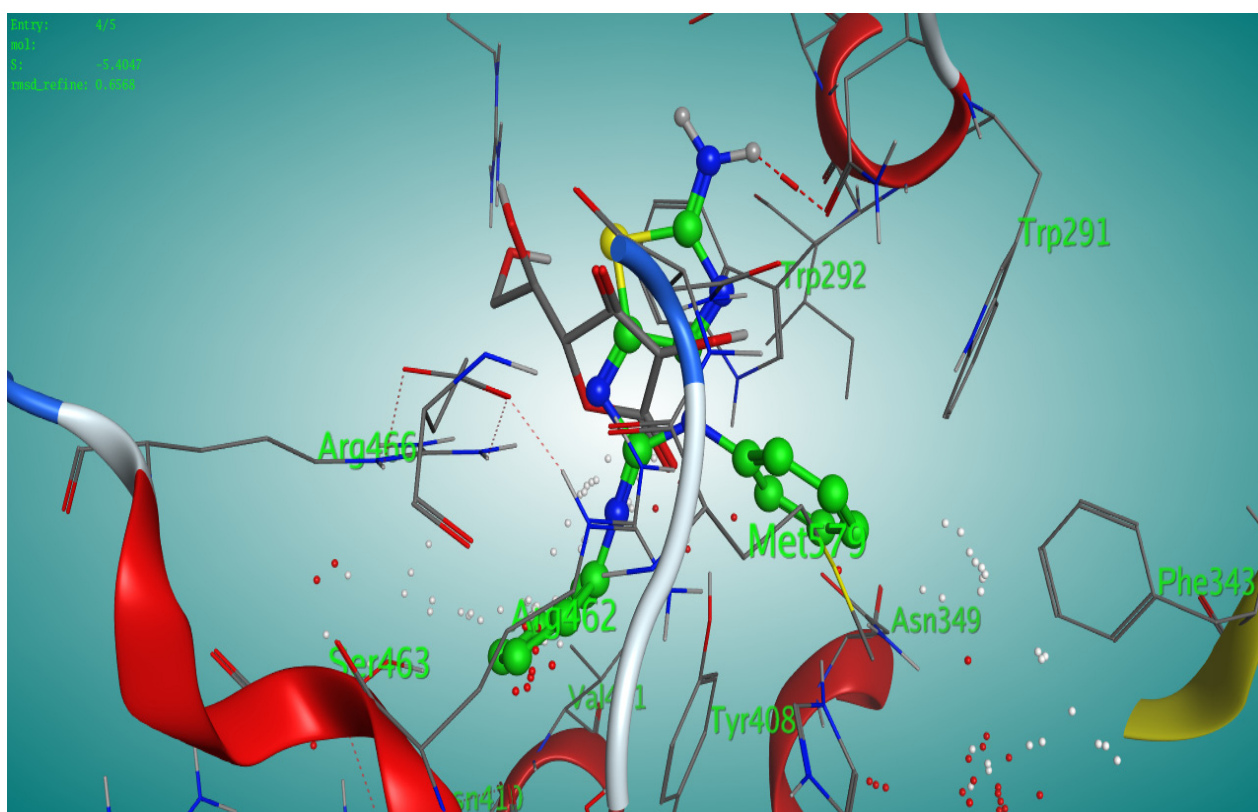

**Figure S16.** 3D interaction images of compound 3 with the active sites of 1F9G.

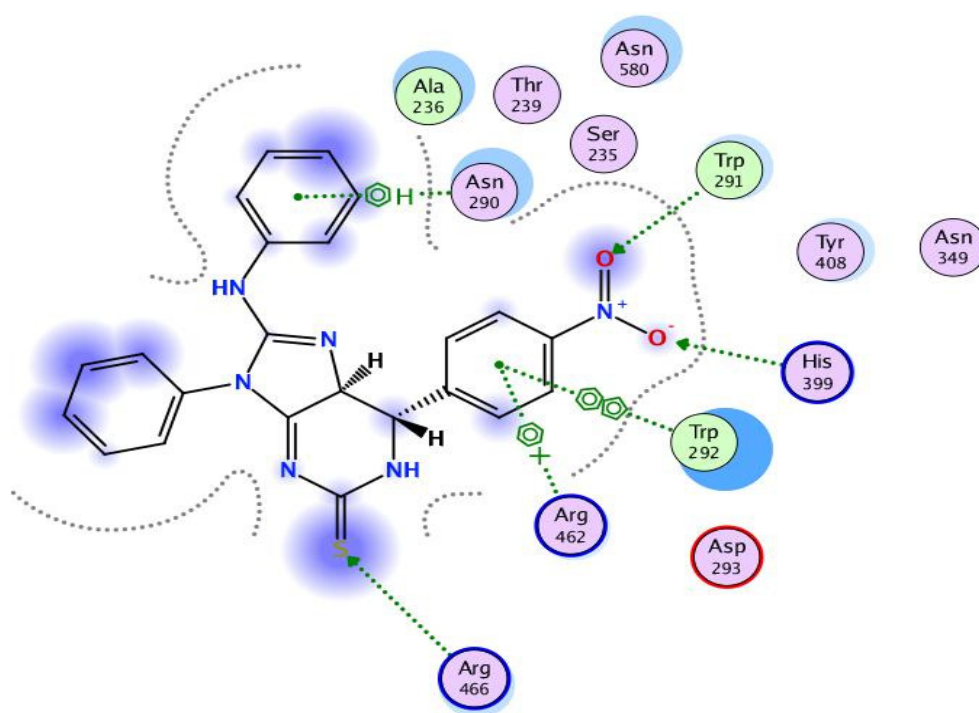

**Figure S17.** 2D interaction images of compound 5 with the active sites of 1F9G.

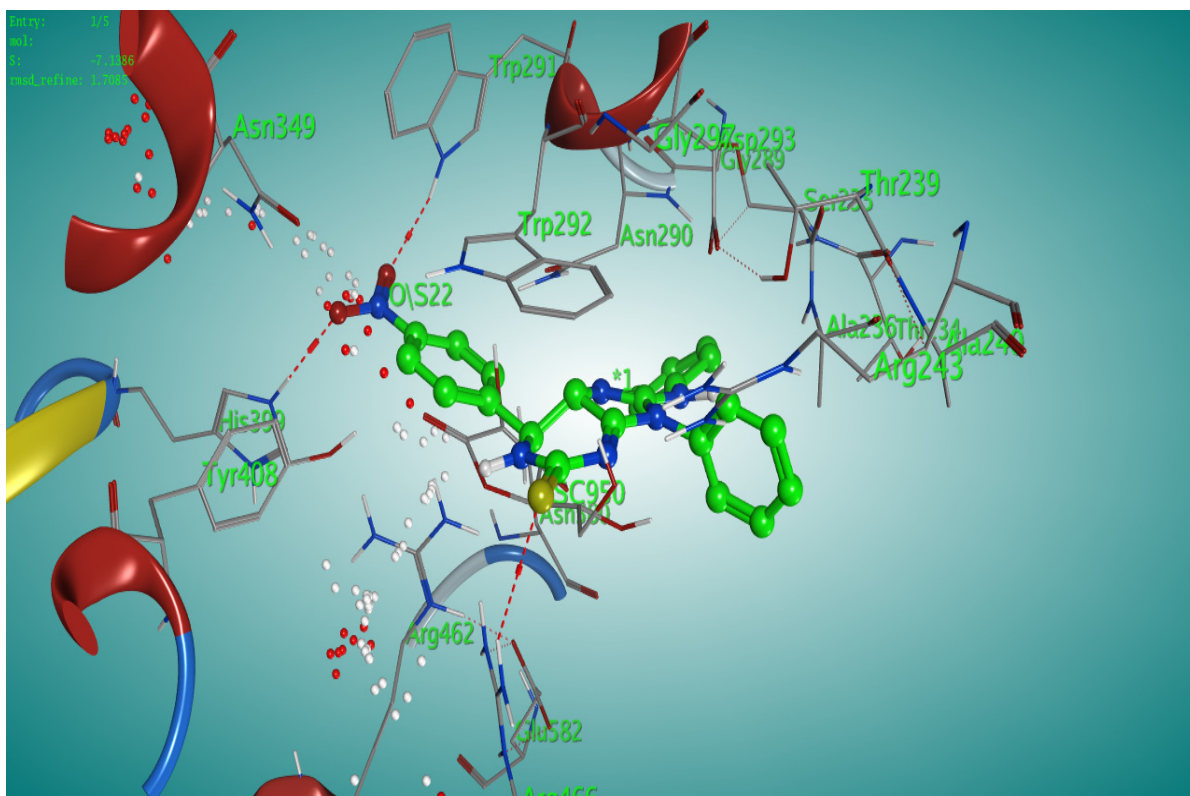

**Figure S18.** 3D interaction images of compound 5 with the active sites of 1F9G.

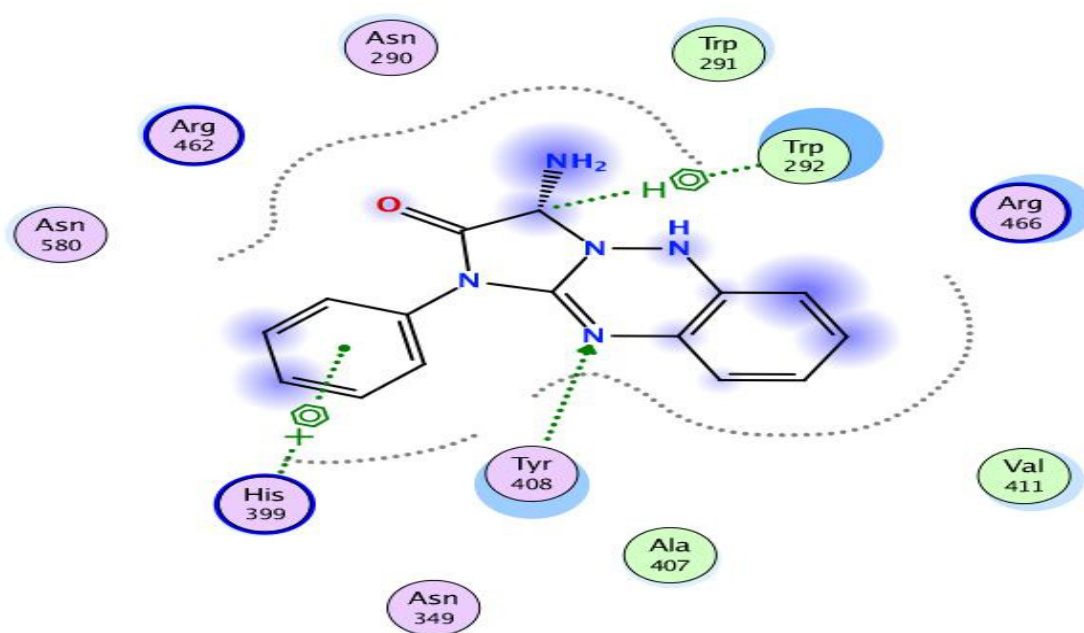

**Figure S19.** 2D interaction images of compound 6 with the active sites of 1F9G.

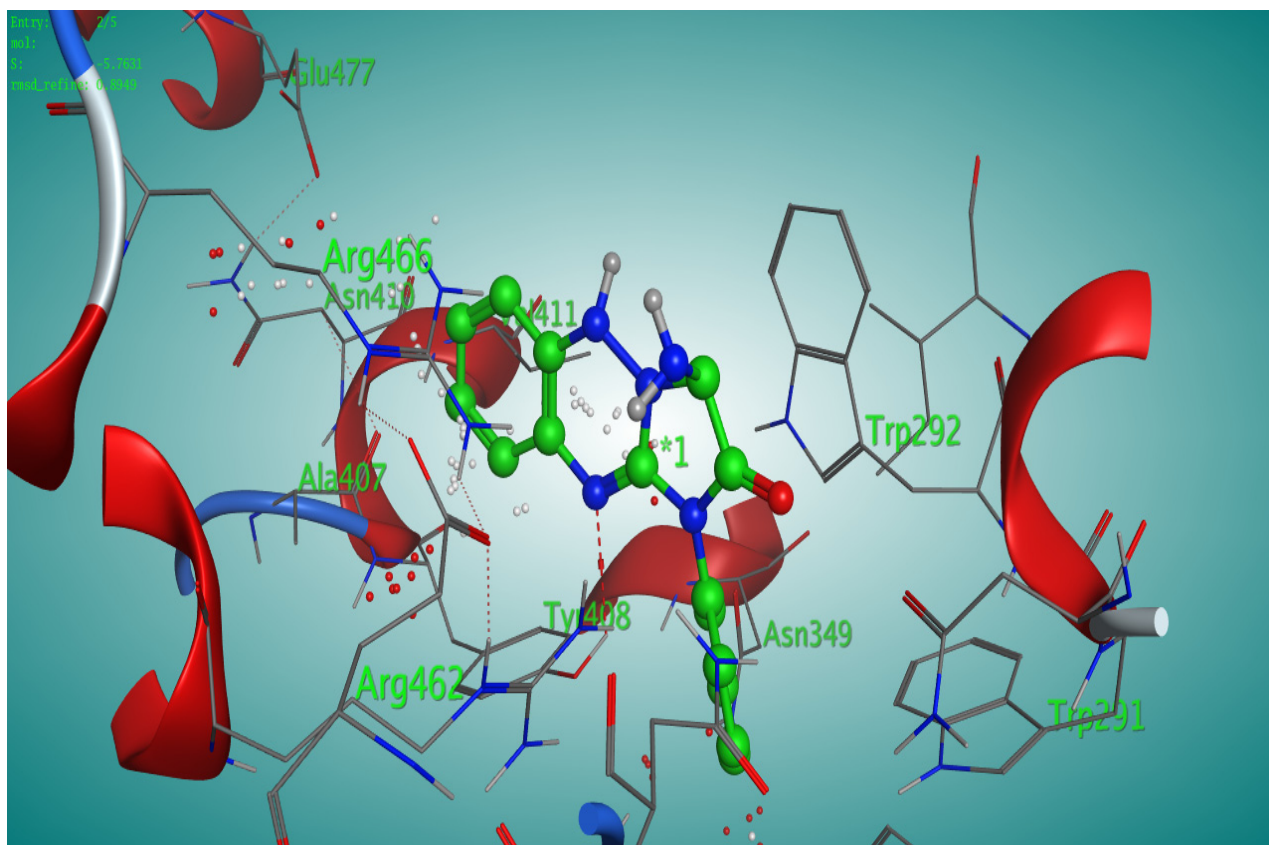

**Figure S20.** 3D interaction images of compound **6** with the active sites of 1F9G.

## Chemistry

All chemicals were purchased from Sigma-Aldrich (Taufkirchen, Germany), and all solvents were purchased from El-Nasr Pharmaceutical Chemicals Company (analytical reagent grade, Egypt). All chemicals were used as supplied without further purification. The melting points were measured by a digital Electrothermal IA 9100 Series apparatus Cole-Parmer, Beacon Road, Stone, Staffordshire, ST15 OSA, UK) and were uncorrected. C, H, and N analyses were carried out on a PerkinElmer CHN 2400. IR spectra were recorded on FT-IR 460 PLUS (KBr disks) in the range from 4000 to 400  $\text{cm}^{-1}$ .  $^1\text{H}$  and  $^{13}\text{C}$ -NMR spectra were recorded on a Bruker 400 MHz NMR Spectrometer using tetramethylsilane (TMS) as the internal standard, chemical shifts are expressed in  $\delta$  (ppm), and DMSO- $d_6$  was used as the solvent. At the Regional Centre for Mycology & Biotechnology (RCMB) Al-Azhar University, Naser City, Cairo.

## Data analysis

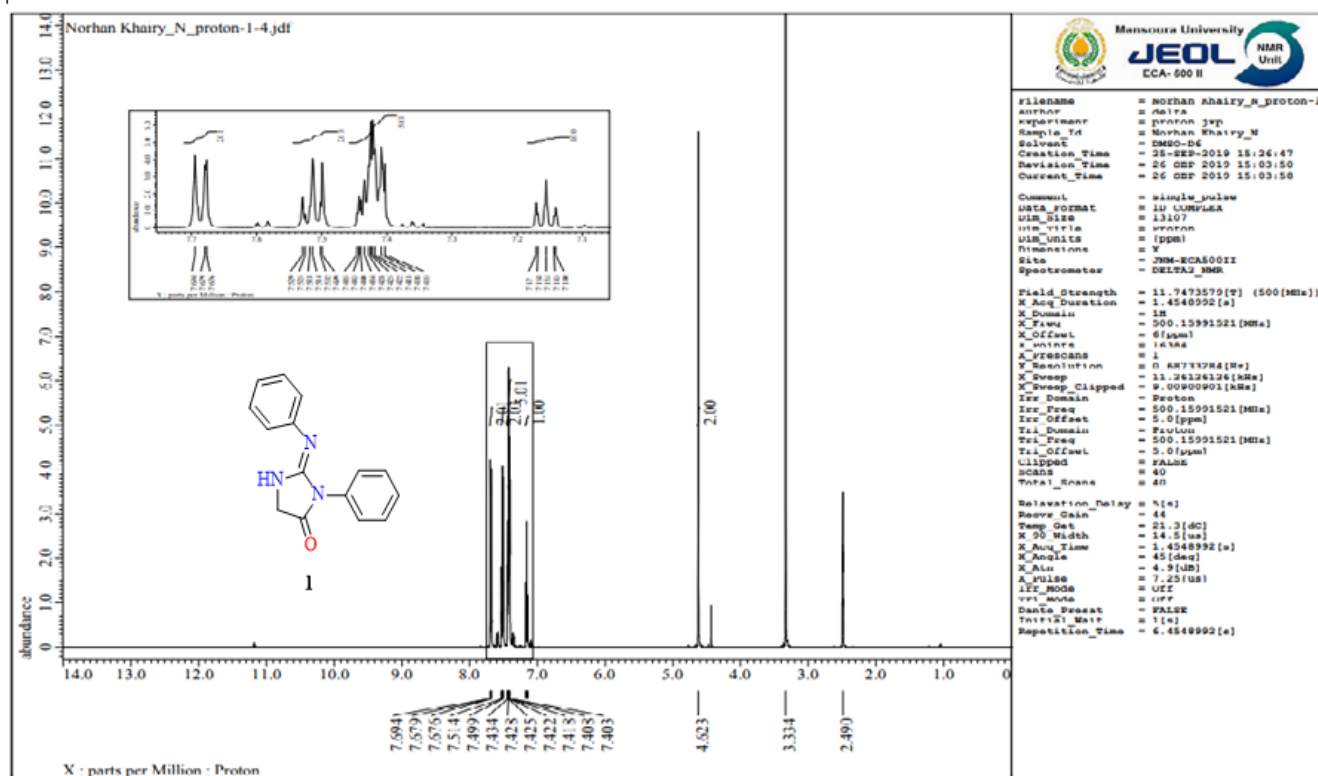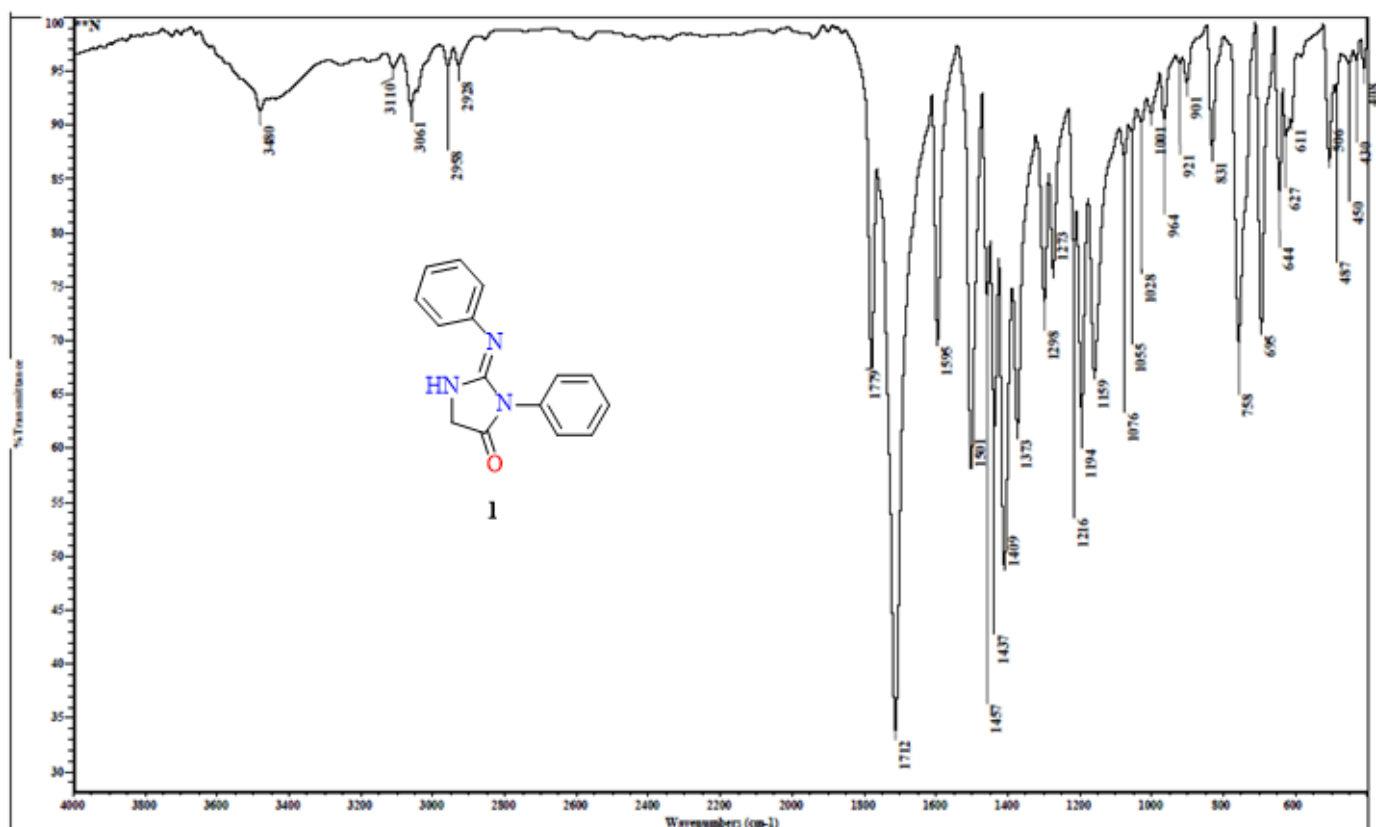

Number of sample scans: 32  
 Number of background scans: 32  
 Resolution: 4.000  
 Sample gain: 2.0  
 Optical velocity: 0.4747  
 Aperture: 80.00

ThermoFisher  
 SCIENTIFIC  
 Thu Sep 12 09:40:01 2019 (GMT+02:00)

Mansoura University  
 Faculty of Science  
 Spectral Analysis Unit  
 unitofspectra@gmail.com

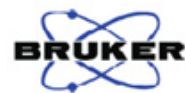

MOH (N10) -1

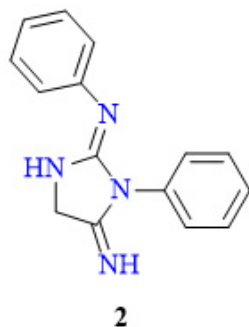

Current Data Parameters  
 Date: 20180221  
 Time: 12.57  
 INSTRUM: spect  
 PROBHD: 5 mm PABBO BBO  
 PULPROG: zg30  
 TD: 65536  
 SOLVENT: DMSO  
 NS: 64  
 DS: 2  
 SWH: 8012.820 Hz  
 FIDRES: 0.122266 Hz  
 AQ: 6.0884465 sec  
 RG: 30.98  
 EQ: 62.400 usec  
 DE: 4.50 usec  
 TE: 300.2 K  
 D1: 1.00000000 sec  
 TDO: 1

===== CHANNEL f1 =====  
 ZFO1: 400.1724712 MHz  
 NUC1: 1H  
 P1: 10.00 usec  
 PLM1: 14.50000000 W

F2 - Processing parameters  
 SI: 65536  
 SF: 400.1700000 MHz  
 GCW: 32K  
 LB: 0.30 Hz  
 CB: 0  
 PC: 1.00

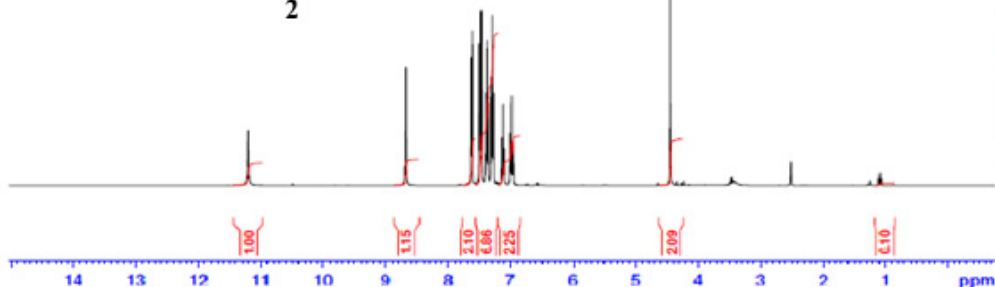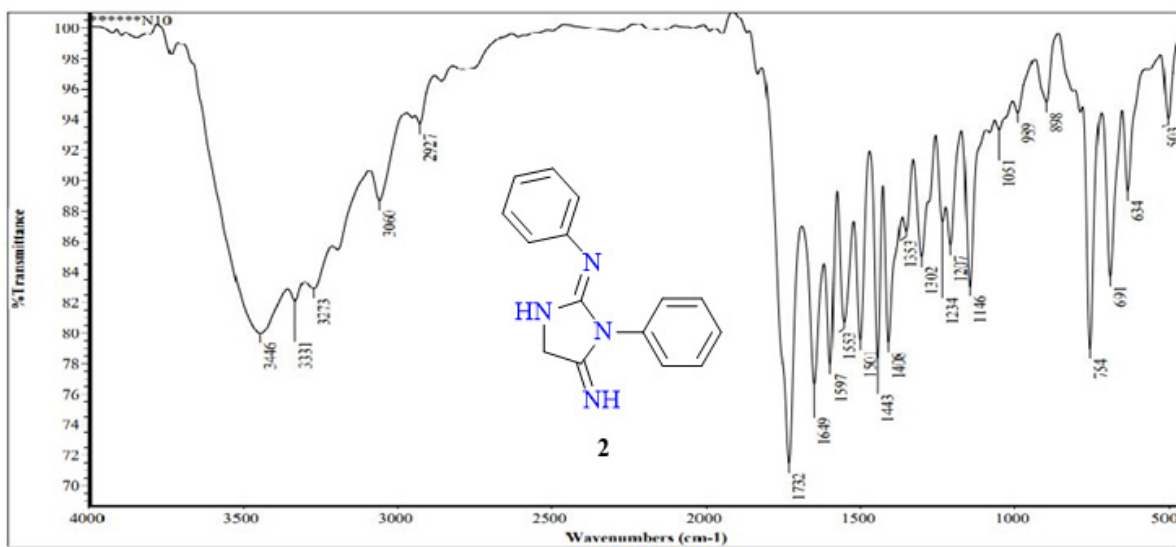

\*\*\*\*\*N10

Number of sample scans: 32  
 Number of background scans: 32  
 Resolution: 4.000  
 Sample gain: 2.0  
 Optical velocity: 0.4747  
 Aperture: 80.00

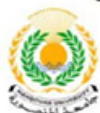

**ThermoFisher**  
 SCIENTIFIC

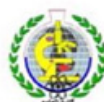

Mansoura University  
 Faculty of Science  
 Spectral Analyses unit  
 Chemistry Department  
 ThermoFisher Nicolette IS10, US/  
 Spectral range: 4000 - 400 cm-1

Sat Mar 10 08:58:46 2018 (GMT-08:00)

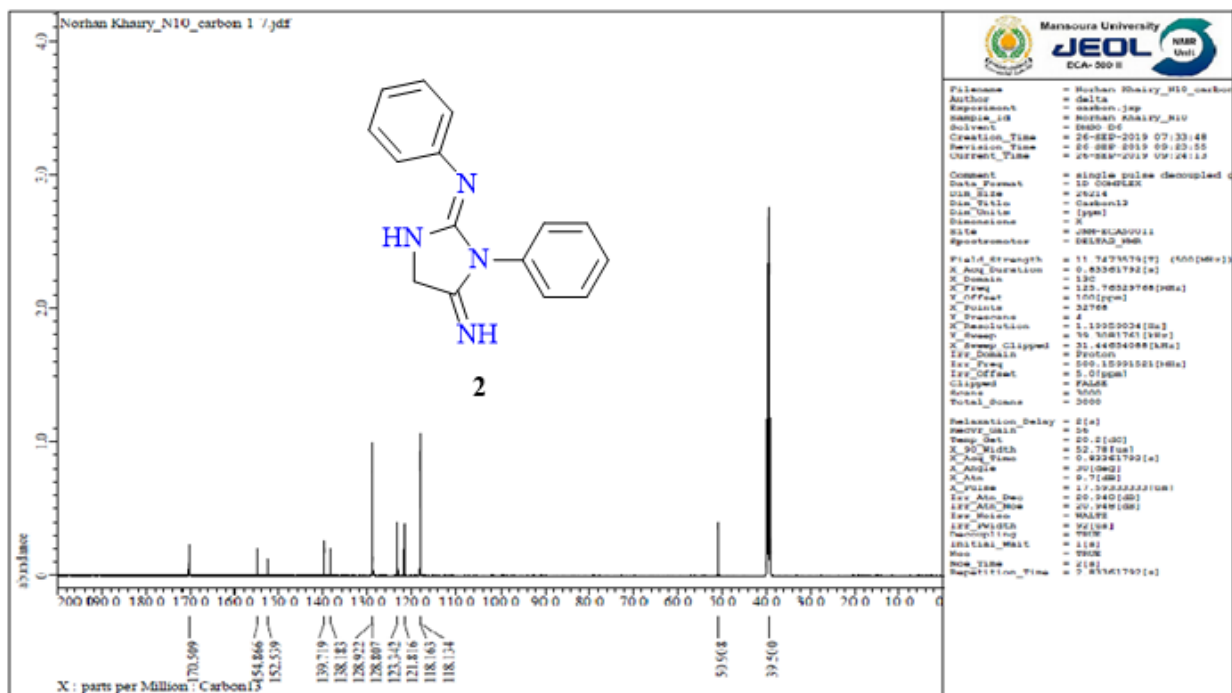

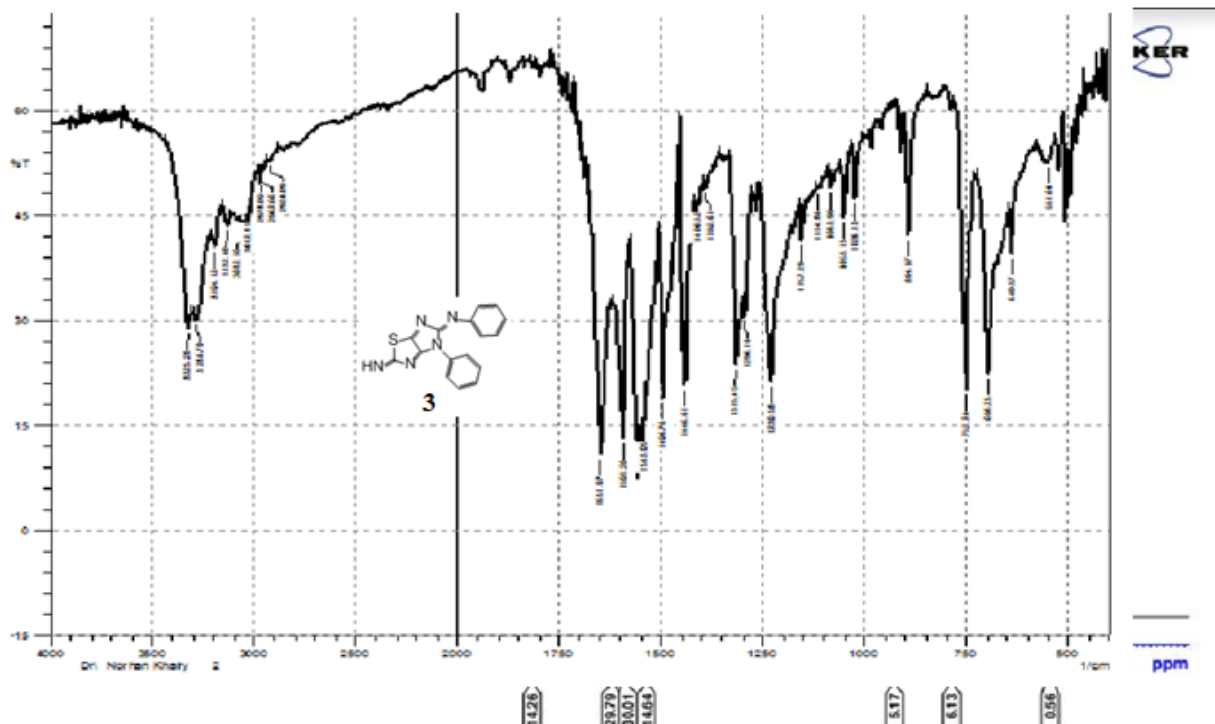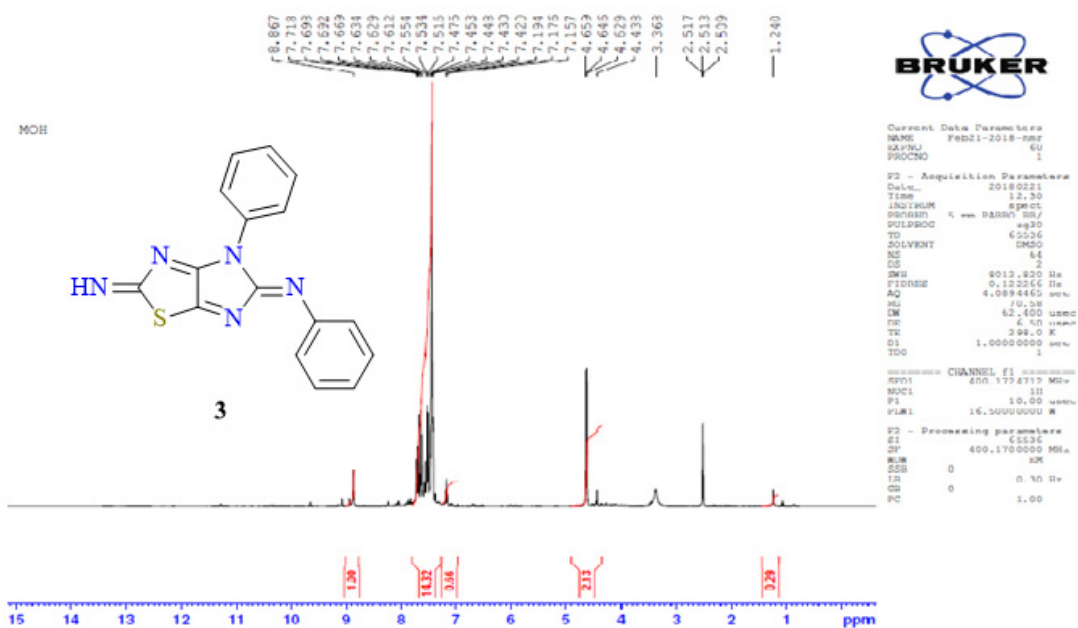

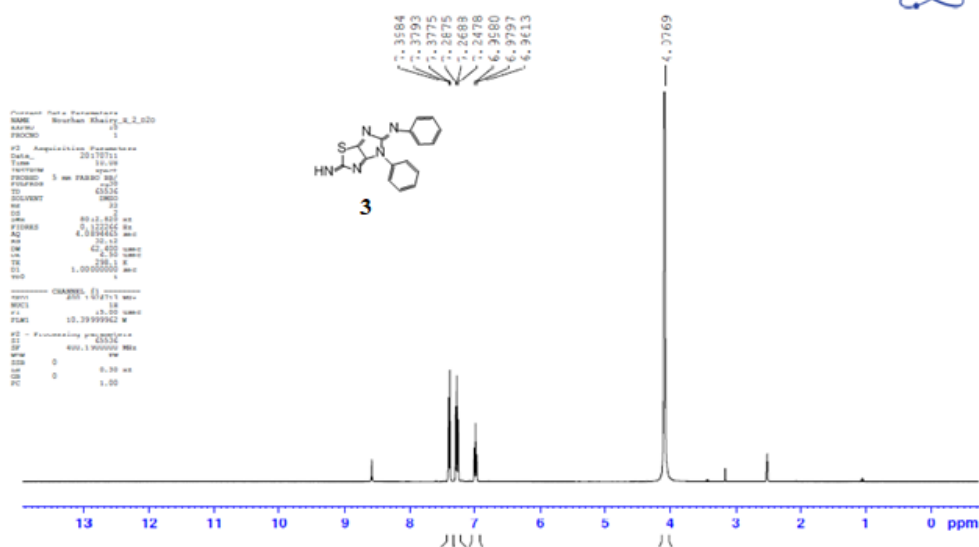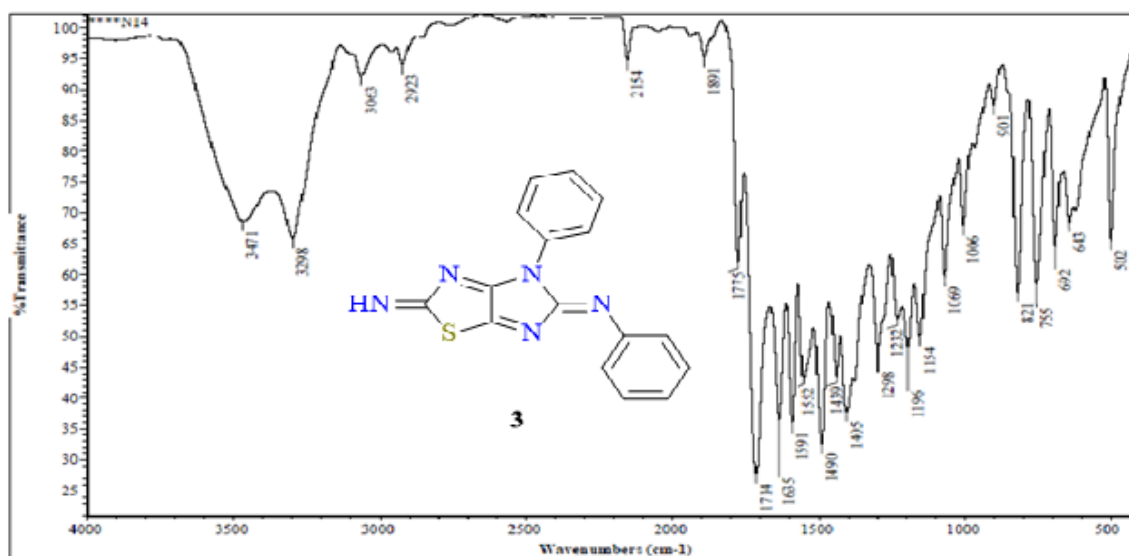<sup>14</sup>N14

Number of sample scans: 32  
Number of background scans: 32  
Resolution: 4,000  
Sample gain: 4.0  
Optical velocity: 0.4747  
Aperture: 80.00

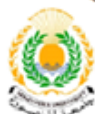

**ThermoFisher**  
SCIENTIFIC

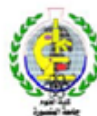

Mansoura University  
Faculty of Science  
Spectral Analyses unit  
Chemistry Department  
ThermoFisher Nicolette IS10, USA  
Spectral range: 4000 - 400 cm<sup>-1</sup>

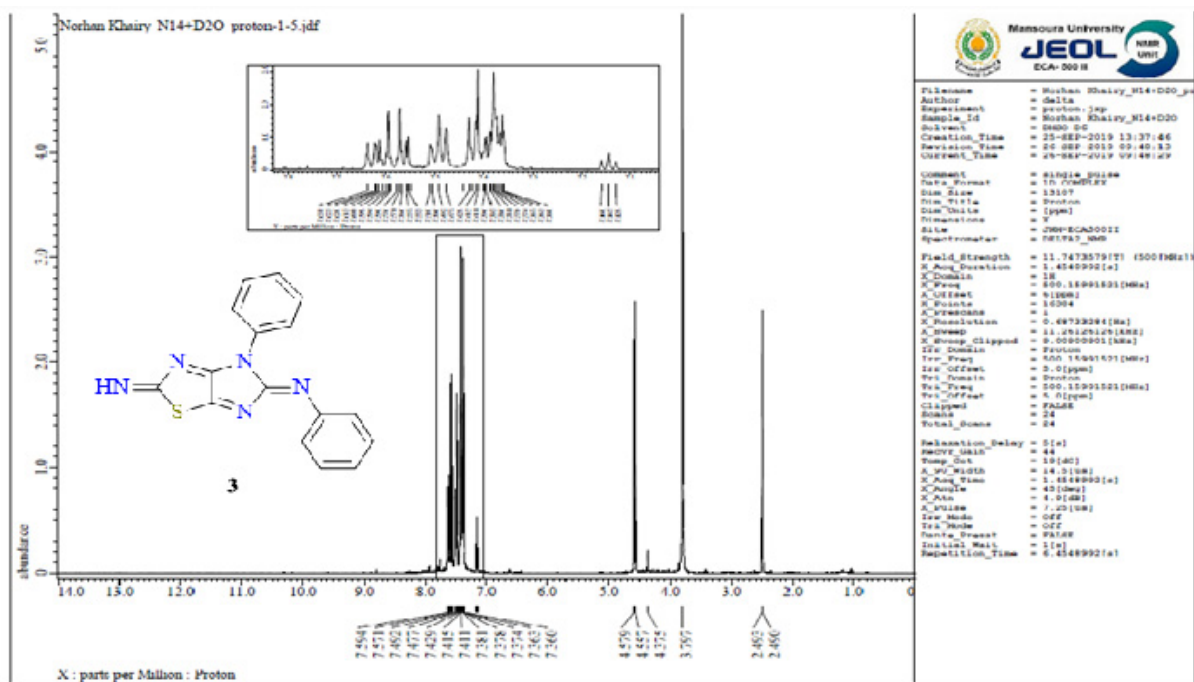





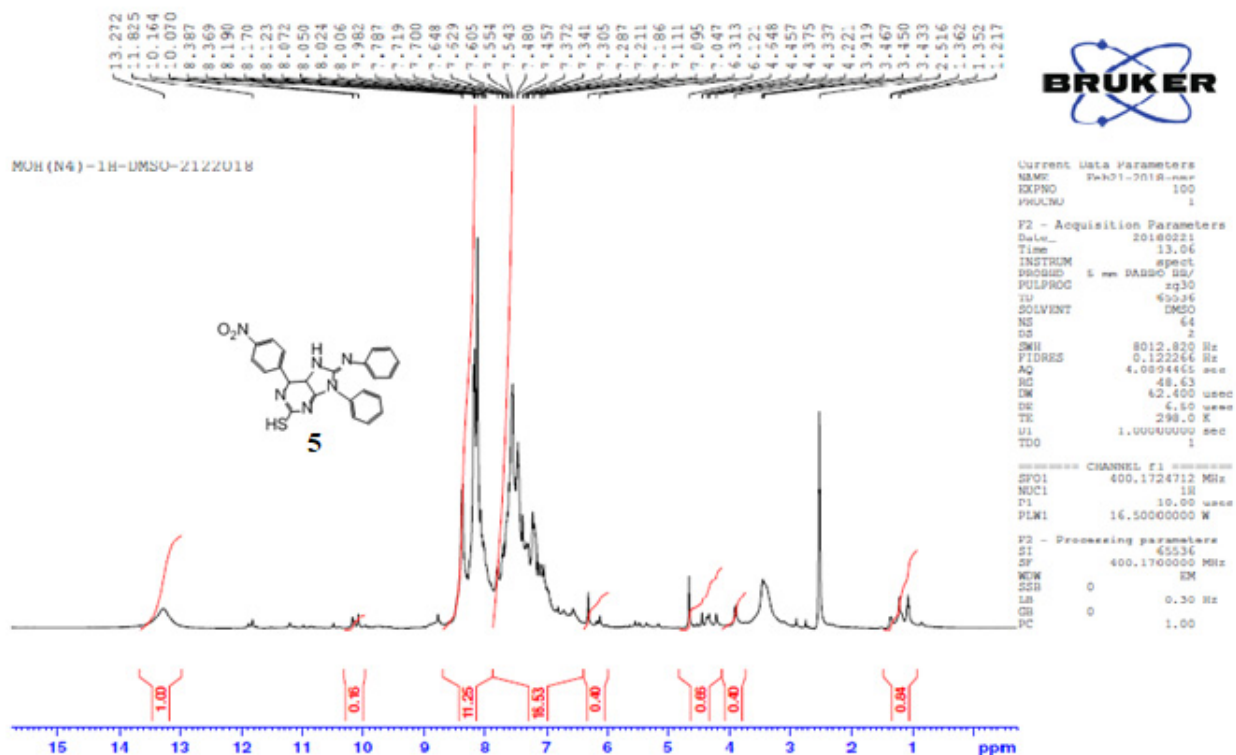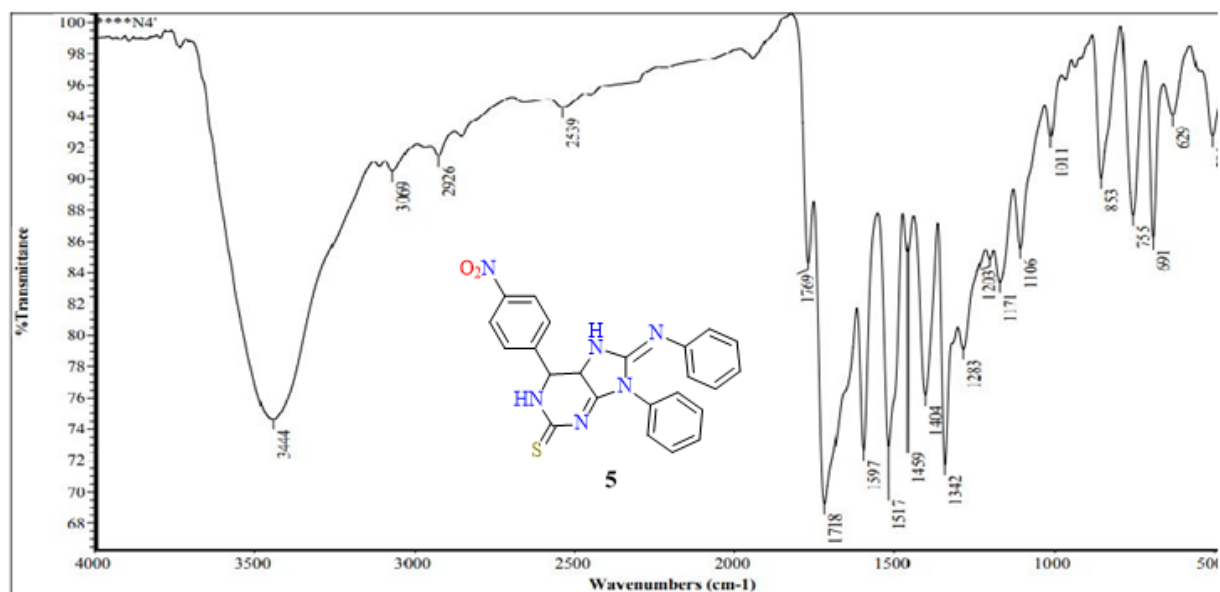

\*\*\*N4'

Number of sample scans: 32  
 Number of background scans: 32  
 Resolution: 4.000  
 Sample gain: 2.0  
 Optical velocity: 0.4747  
 Aperture: 80.00

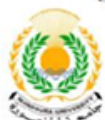

**ThermoFisher**  
 SCIENTIFIC

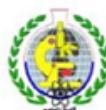

Mansoura University  
 Faculty of Science  
 Spectral Analyses unit  
 Chemistry Department  
 ThermoFisher Nicolette IS10, US.  
 Spectral range: 4000 - 400 cm<sup>-1</sup>

Sat Mar 10 09:00:11 2018 (GMT-08:00)



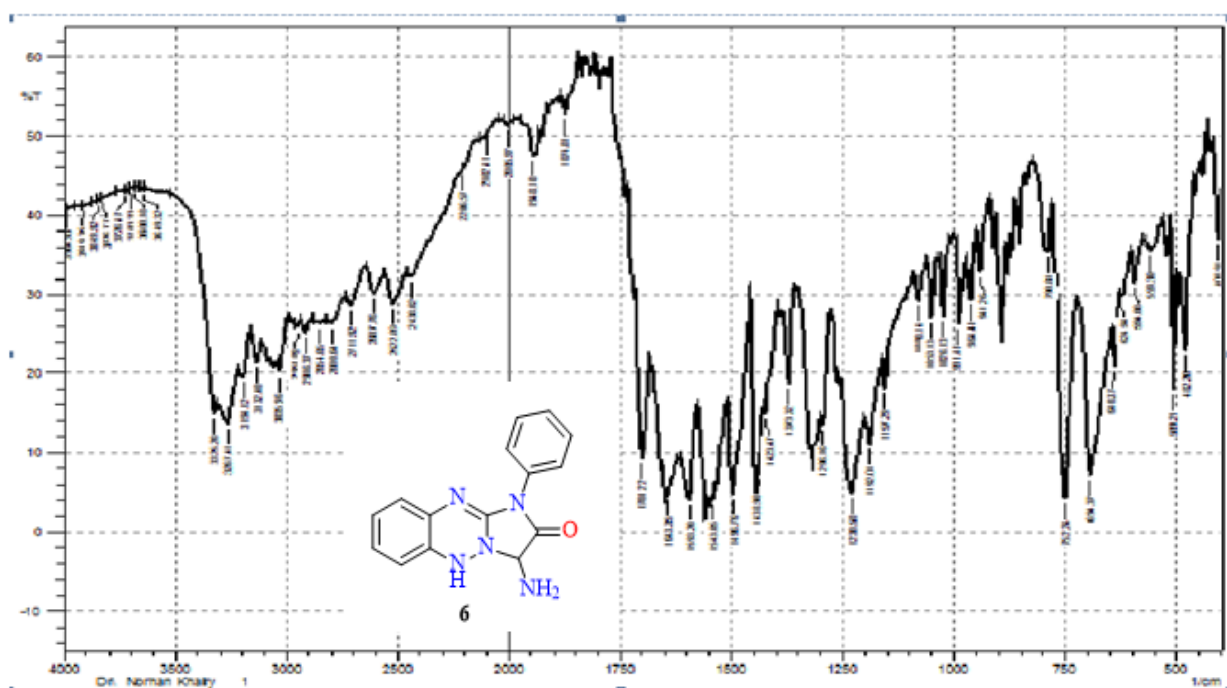

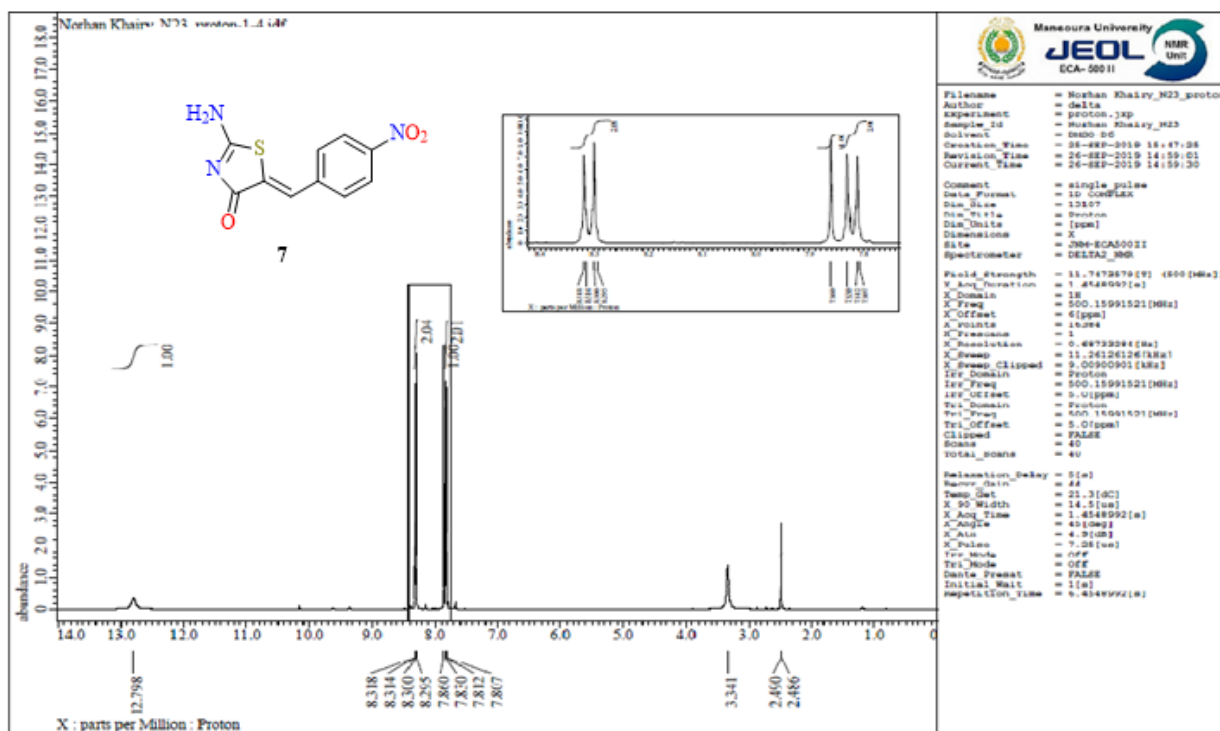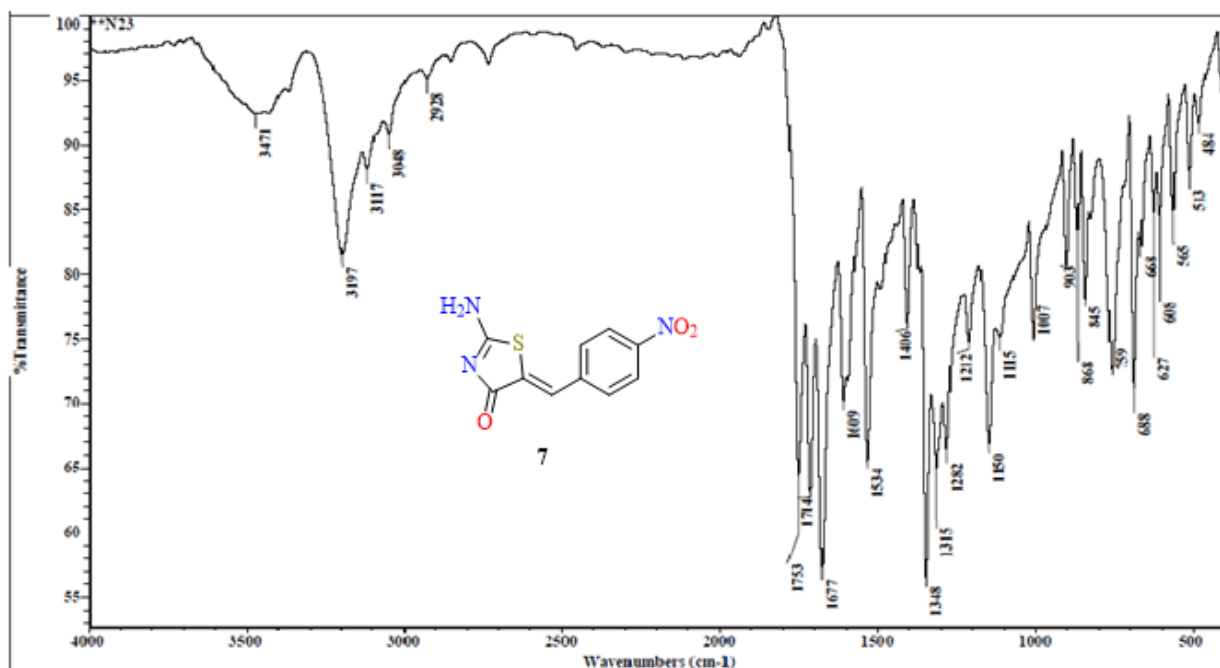

Number of sample scans: 32  
 Number of background scans: 32  
 Resolution: 4.000  
 Sample gain: 2.0  
 Optical velocity: 0.4747  
 Aperture: 80.00

ThermoFisher  
 SCIENTIFIC  
 Thu Sep 12 09:37:07 2019 (GMT+02:00)

Mansoura University  
 Faculty of Science  
 Spectral Analysis Unit  
 unitofspectra@gmail.com

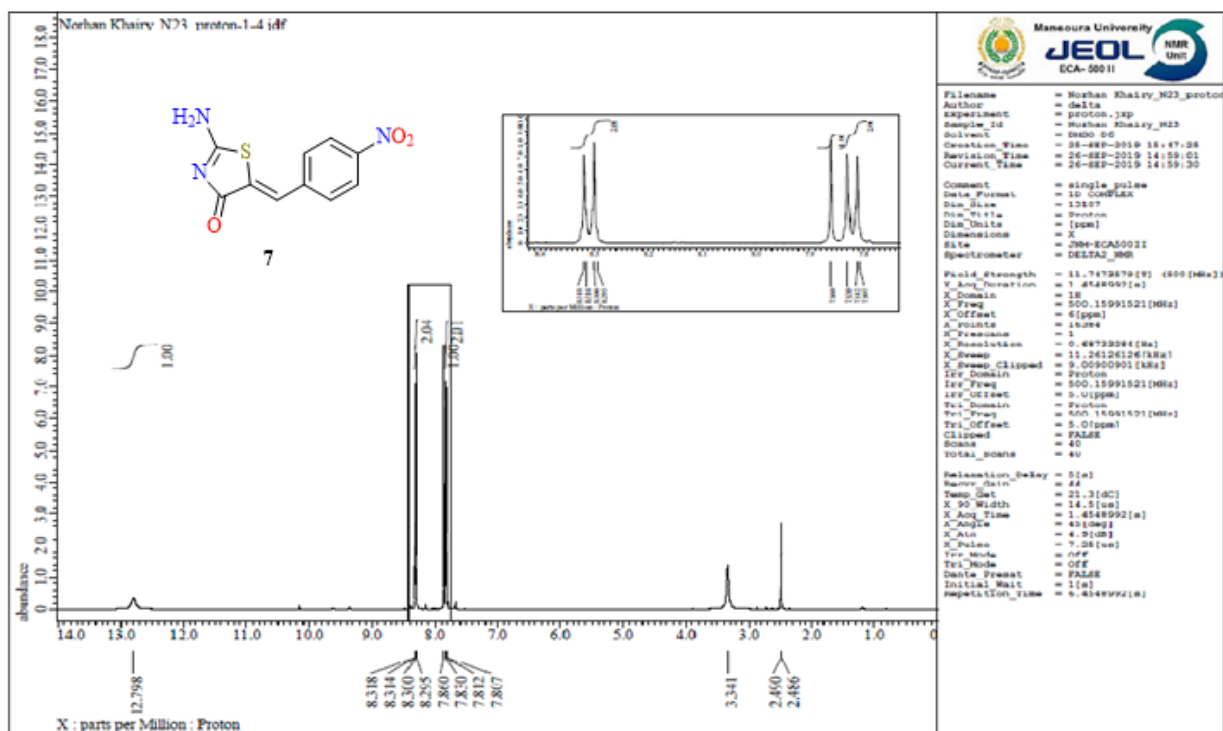



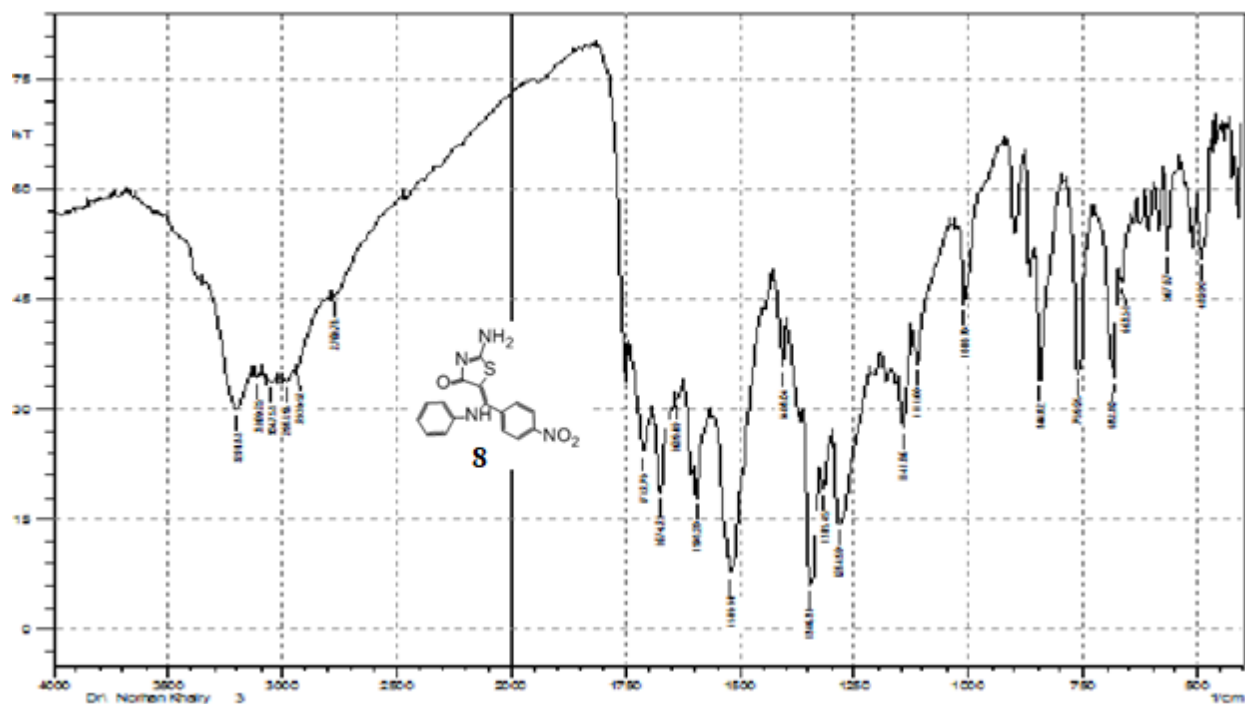

Nourhan Khairy\_H\_3\_D2O

Microanalytical Unit - FOPCU - NMR laboratory  
www.pharma.cu.edu.eg dr-mau.fopcu@pharma.cu.edu.eg

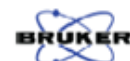

Current Data Parameters  
NAME: Nourhan Khairy\_H\_3\_D2O  
PROCNO: 1

F2 - Acquisition Parameters  
Date\_: 20110111  
Time: 10.13  
INSTRUM: spect  
PROBHD: 5 mm mmQNP 1H/1  
PULPROG: zg30  
PC: 612.14  
SOLVENT: DMSO  
NS: 25  
DS: 4  
AQ: 8012.820 Hz  
FREQ: 400.142644 MHz  
AQ: 6.0000000 sec  
RG: 327.68  
SF: 400.142644 MHz  
WDW: EM  
SSB: 0  
LB: 3.00 Hz  
GB: 0  
PC: 1.00000000 sec  
RG: 1

===== CHANNEL f1 =====  
NUC1: 13C  
P1: 12.00  
PL1: 0.00 dB

F2 - Processing parameters  
SI: 32768  
SF: 400.142644 MHz  
WDW: EM  
SSB: 0  
LB: 3.00 Hz  
GB: 0  
PC: 1.00

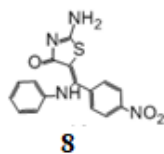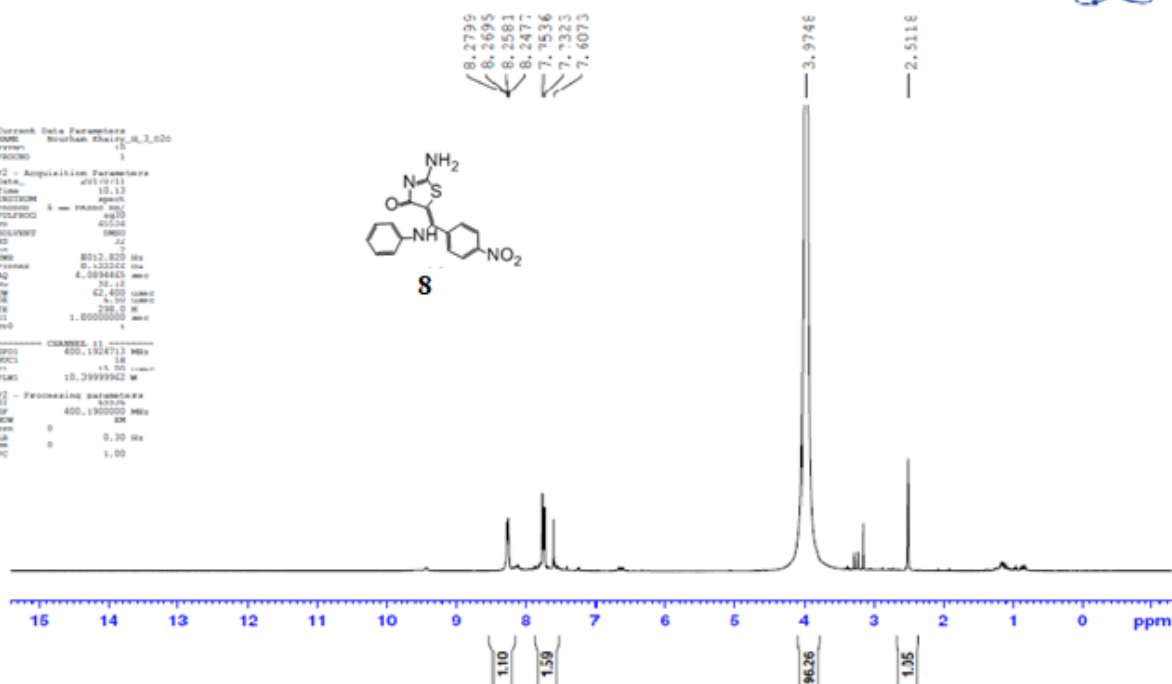

Current Data Parameters  
NAME Nourhan Khairy\_R\_4\_D2O  
EXPNO 10  
PROCNO 1

F2 - Acquisition Parameters  
Date\_ 20170718  
Time 10:18  
PULPROG zgpg30  
PCLOCK 5 sec 19.800 MHz  
PULPROG zgpg30  
RS 0.0000000  
SOLVENT DMSO  
NS 32  
DS 2  
SW 8012.625 Hz  
FIDRES 0.122246 Hz  
AQ 6.089441 sec  
RG 32.12  
SR 62.500 MHz  
OR 6.10 MHz  
TS 498.10 K  
D1 1.00000000 sec  
TD 1

===== CHANNEL f1 =====  
NUC1 13C  
P1 15.00 MHz  
PL1 0.00000000 W

F2 - Processing parameters  
SI 32768  
SF 400.146000 MHz  
WDW EM  
SSB 0  
LB 0.30 Hz  
GB 0  
PC 1.00

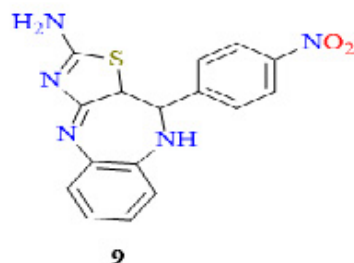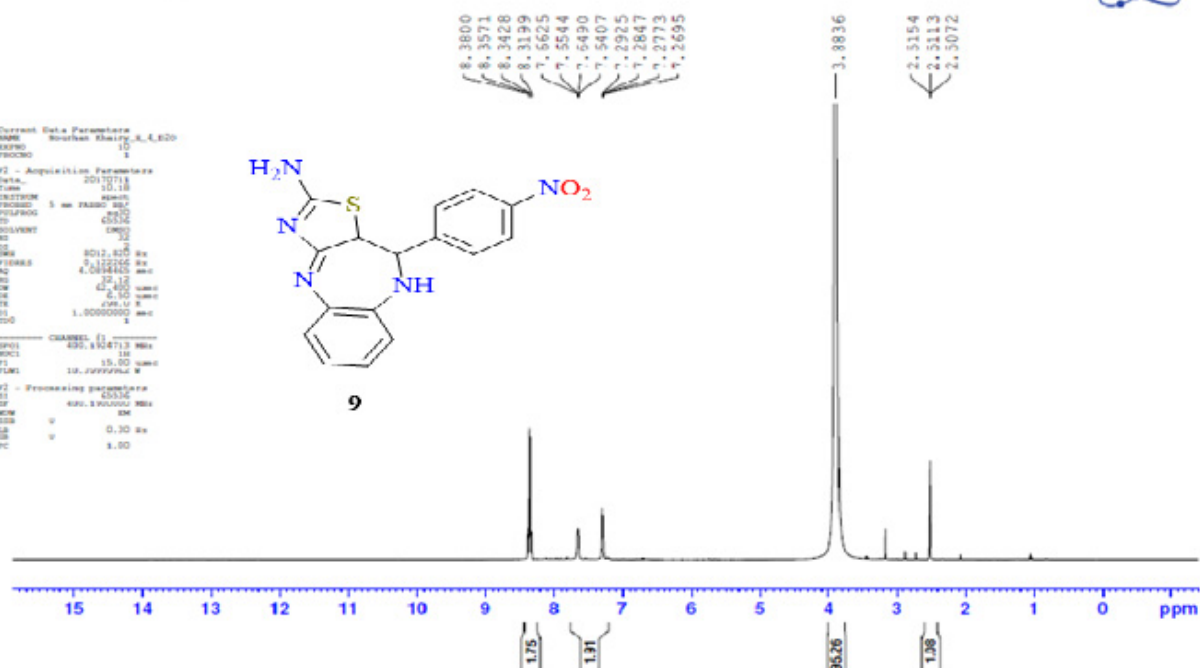

Nourhan Khairy\_H\_4\_D2O

Microanalytical Unit - FOPCU - NMR laboratory  
www.pharma.cu.edu.eg dir-mau.fopcu@pharma.cu.edu.eg

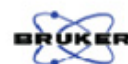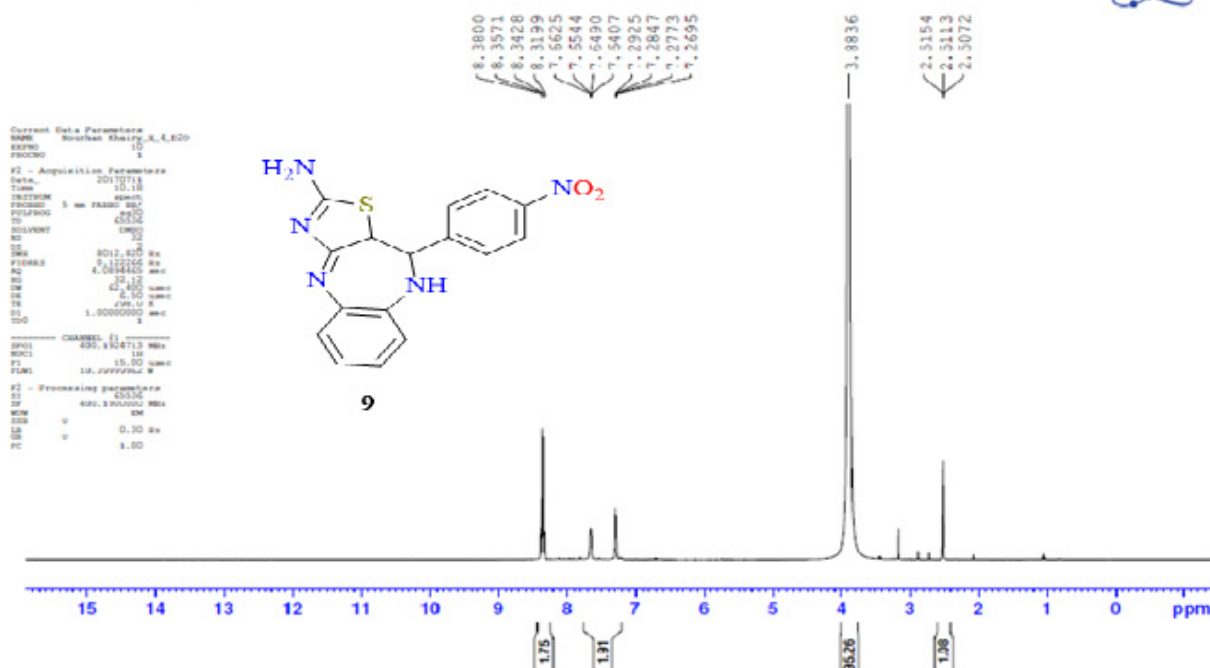

Nourhan Khairy\_H\_4

Microanalytical Unit - FOPCU - NMR laboratory  
www.pharma.cu.edu.eg dir-mau.fopcu@pharma.cu.edu.eg

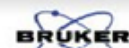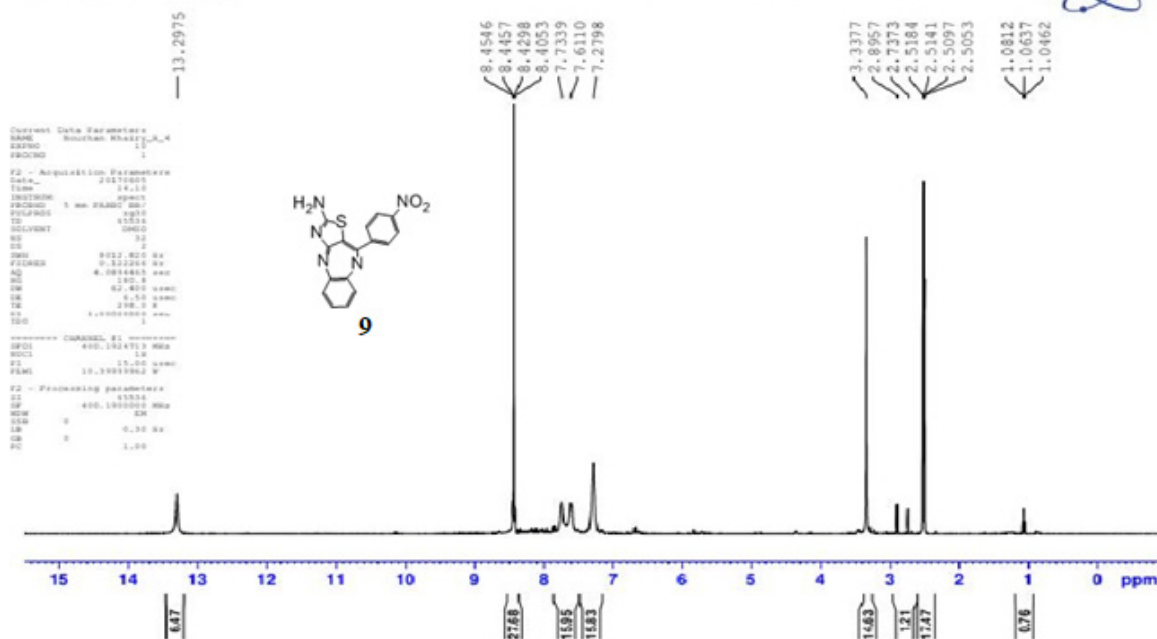

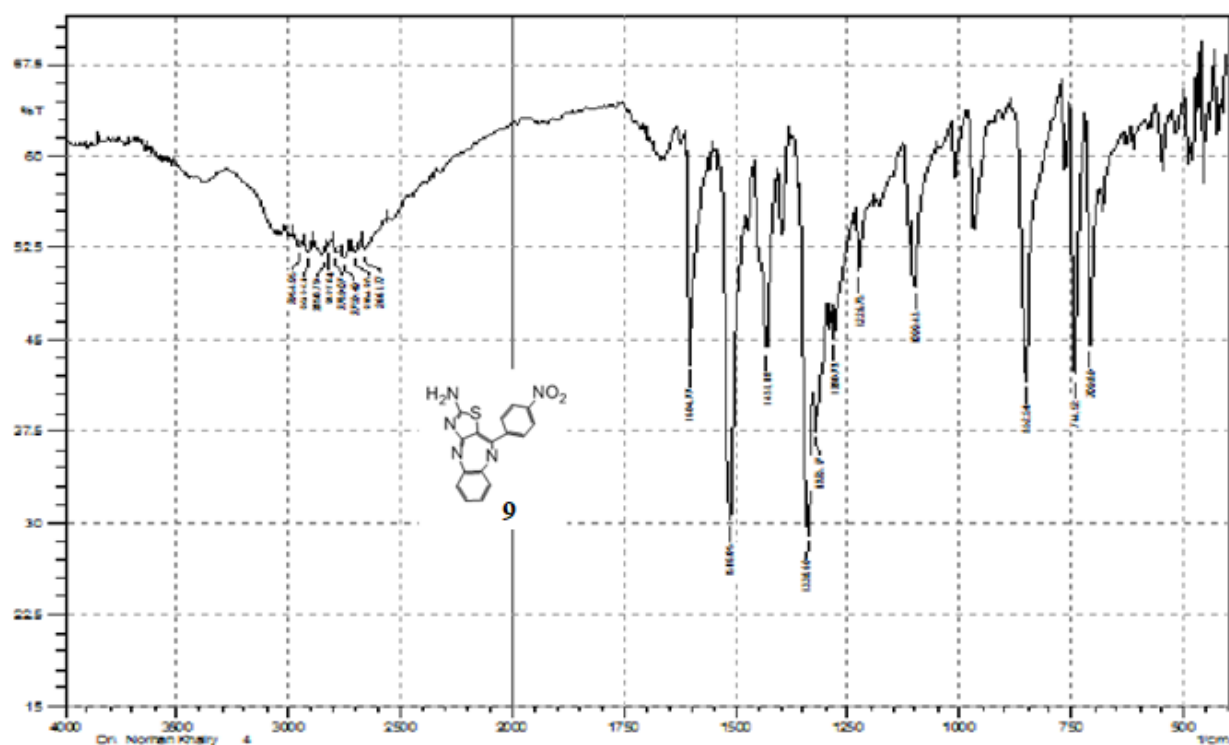

Nourhan Khairy\_R\_4\_D2O

Microanalytical Unit - FOPCU - NMR laboratory  
www.pharma.cu.edu.eg dir-mau.fopcu@pharma.cu.edu.eg

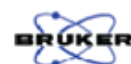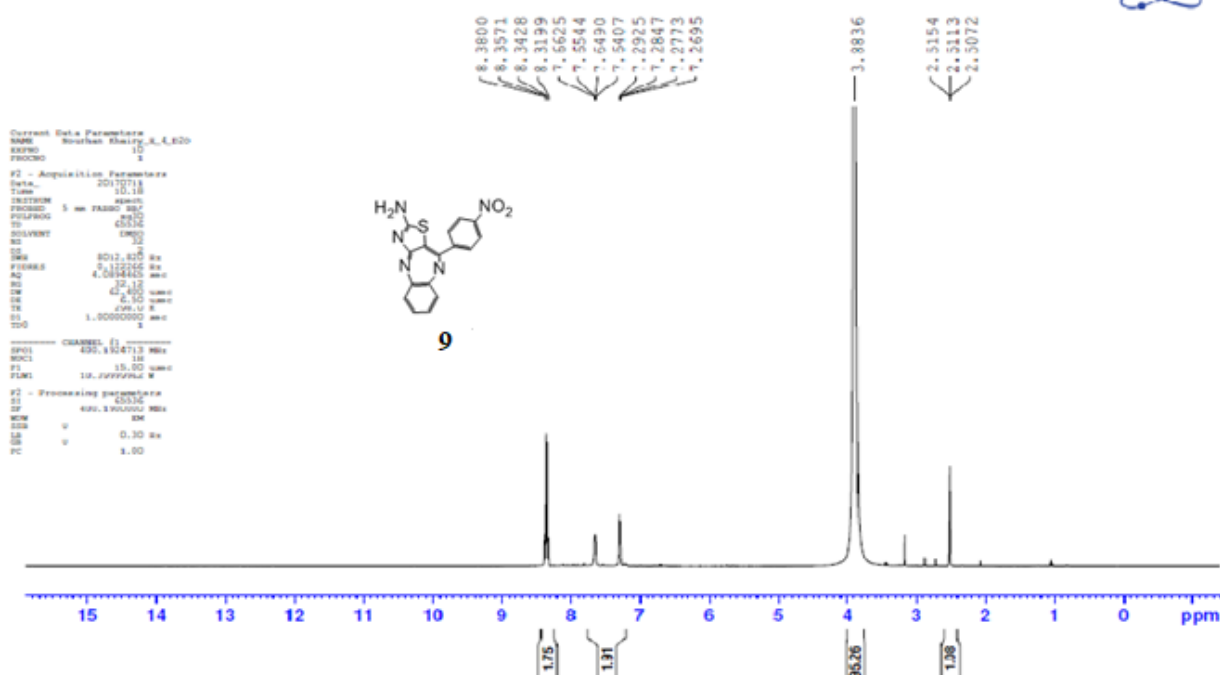

Current Data Parameters  
NAME Nourhan Khairy\_H\_5  
EXPNO 1F2 - Acquisition Parameters  
Date\_ 20170801  
Time 14.15  
INSTRUM spect  
PROBHD 5 mm QNP1H 2B/  
PULPROG zgpg30  
TD 65536  
SOLVENT dmso  
NS 32  
DS 2  
SWH 8012.800 MHz  
FIDRES 0.122244 MHz  
AQ 4.0834613 sec  
RG 180.4  
CW 32.400 uHz  
DE 6.70 uHz  
TE 298.2 K  
F1 100.626126 MHz  
F2 400.146099 MHz===== CHANNEL f1 =====  
NUC1 15N  
P1 12.00 uSec  
PL1 0.00 dBF2 - Processing parameters  
SI 32768  
SF 400.146099 MHz  
WDW EM  
SSB 0  
LB 0.10 Hz  
GB 0  
PC 1.00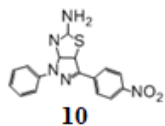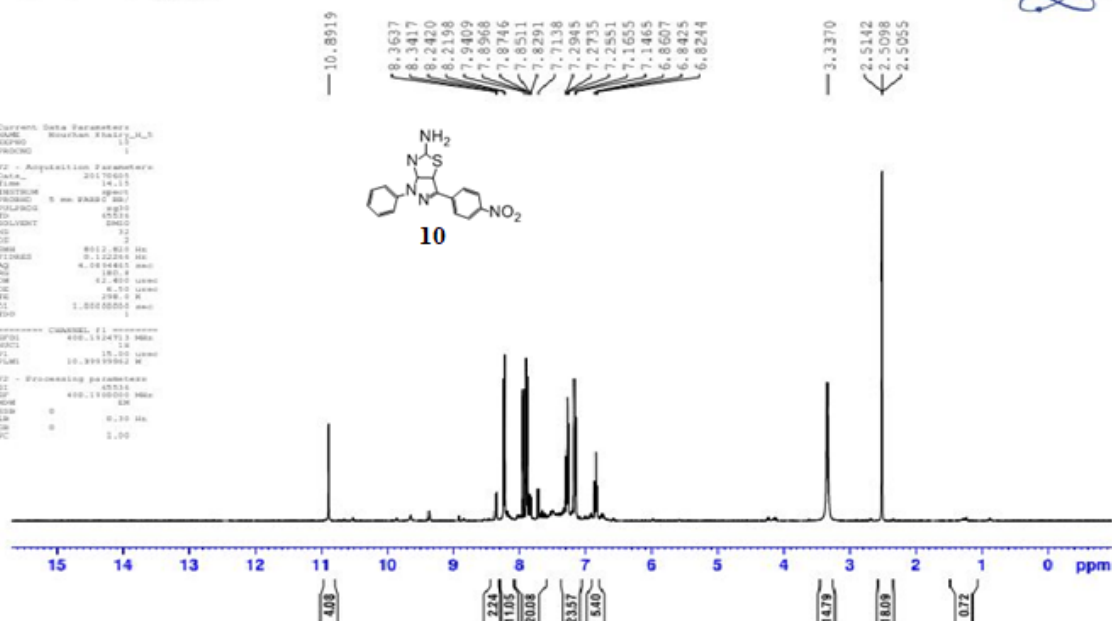

N34-13C-DMSO-1582018

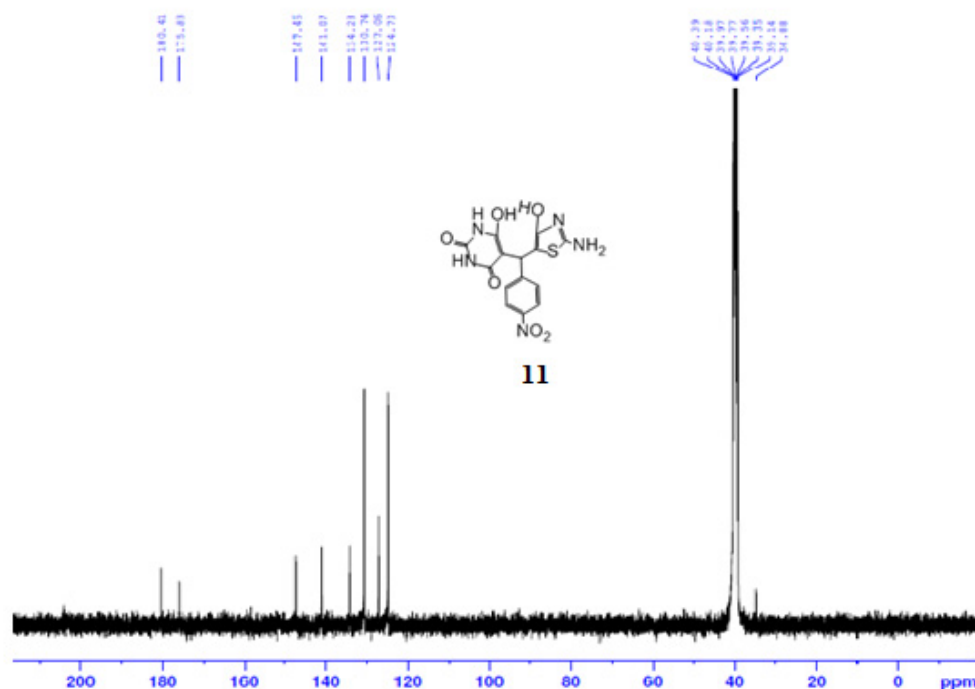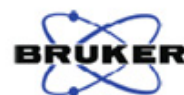

Current Data Parameters  
NAME: Aug15-2018-nmr  
EXPNO: 80  
PROCNO: 1

F2 - Acquisition Parameters  
Date\_: 20180815  
Time: 14.59  
INSTRUM: spect  
PROBHD: 5 mm PASSEL 1H/13C  
PULPROG: zgpg30  
TD: 65536  
SOLVENT: DMSO  
NS: 1024  
DS: 2  
SWH: 24038.461 Hz  
FIDRES: 0.366798 Hz  
AQ: 1.3631488 sec  
RG: 194.81  
DW: 20.800 usec  
DE: 6.50 usec  
TE: 300.0 K  
D1: 2.00000000 sec  
D11: 0.03000000 sec  
TD0: 1

===== CHANNEL f1 =====  
SFO1: 100.6288883 MHz  
NUC1: 13C  
P1: 10.00 usec  
PLM1: 0.00000000 M

===== CHANNEL f2 =====  
SFO2: 400.1716007 MHz  
NUC2: 1H  
PCPDPRG2: waltz16  
PCPD2: 90.00 usec  
PLM2: 16.50000000 M  
PLM12: 0.20370001 M  
PLM13: 0.16500001 M

F2 - Processing parameters  
SI: 32768  
SF: 100.6288270 MHz  
WDW: EM  
SSB: 0  
LB: 1.00 Hz  
GB: 0  
PC: 1.40

N34-1H-DMSO+D2O-592018

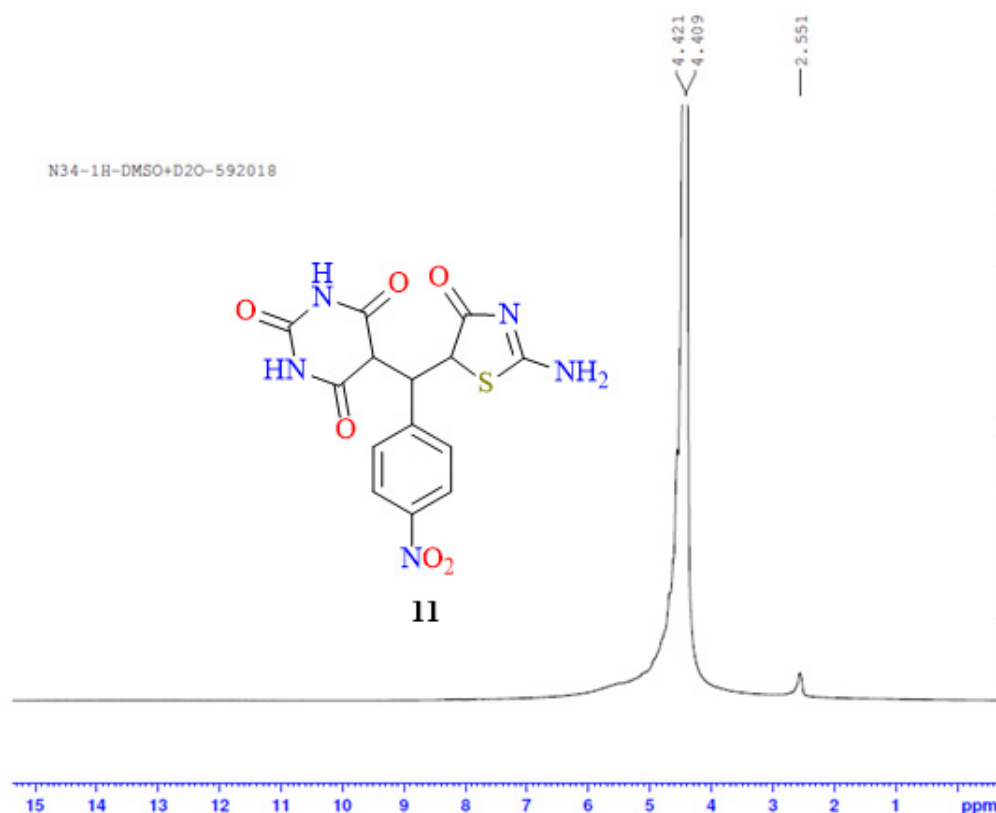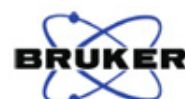

Current Data Parameters  
NAME: Sep05-2018-nmr  
EXPNO: 80  
PROCNO: 1

F2 - Acquisition Parameters  
Date\_: 20180905  
Time: 13.36  
INSTRUM: spect  
PROBHD: 5 mm PASSEL 1H/13C  
PULPROG: zg30  
TD: 65536  
SOLVENT: DMSO  
NS: 64  
DS: 2  
SWH: 8012.820 Hz  
FIDRES: 0.122244 Hz  
AQ: 4.0894445 sec  
RG: 30.88  
DW: 62.400 usec  
DE: 6.50 usec  
TE: 298.0 K  
D1: 1.00000000 sec  
TD0: 1

===== CHANNEL f1 =====  
SFO1: 400.1724712 MHz  
NUC1: 1H  
P1: 10.00 usec  
PLM1: 16.50000000 M

F2 - Processing parameters  
SI: 65536  
SF: 400.1700000 MHz  
WDW: EM  
SSB: 0  
LB: 0.30 Hz  
GB: 0  
PC: 1.00
